# Supplementary material for: Prediction of neo-epitope immunogenicity reveals TCR recognition determinants and provides insight into immunoediting
Source: PubMed Central journal article supplement — Cell Rep Med. 2021 Feb 6;2(2):100194. doi: 10.1016/j.xcrm.2021.100194 (PMC7897774; doi:10.1016/j.xcrm.2021.100194), 2021-02-06
Supplement: mmc6.pdf [file mmc6.pdf]

# Prediction of neo-epitope immunogenicity reveals TCR recognition determinants and provides insight into immunoediting

## Graphical Abstract

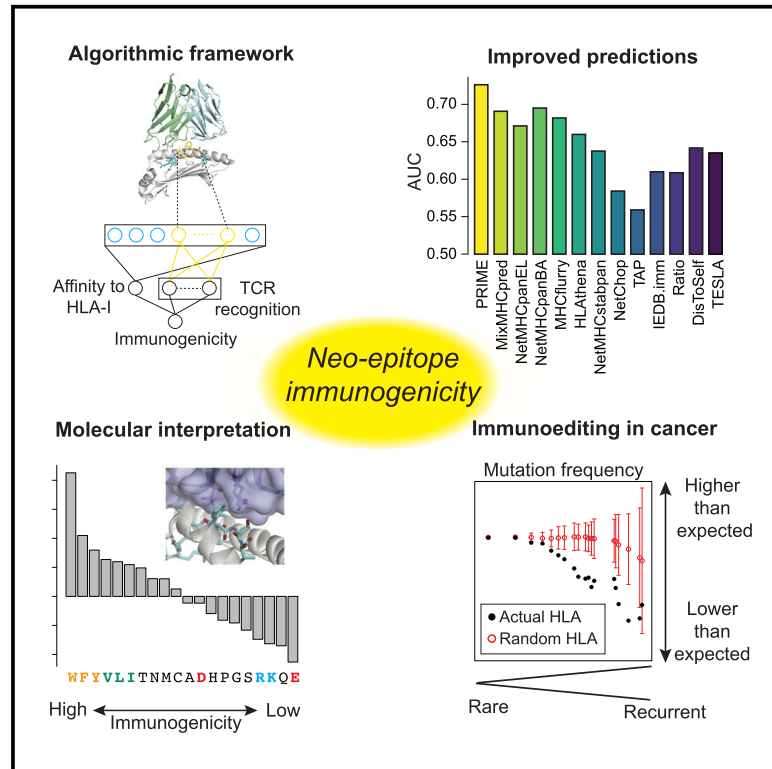

## Authors

Julien Schmidt, Angela R. Smith, Morgane Magnin, ..., Brian M. Baker, Alexandre Harari, David Gfeller

## Correspondence

brian-baker@nd.edu (B.M.B.), alexandre.harari@chuv.ch (A.H.), david.gfeller@unil.ch (D.G.)

## In Brief

Schmidt et al. develop a predictor of immunogenicity (PRIME) for CD8 T cell epitopes that captures antigen presentation on HLA molecules and TCR recognition. Their results reveal molecular determinants of TCR recognition and support immunoediting acting on recurrent cancer mutations.

## Highlights

- Development of a predictor of immunogenic CD8 T-cell epitopes (PRIME)
- PRIME shows improved prediction accuracy on neo-epitopes
- PRIME reveals molecular determinants of TCR recognition
- PRIME supports immunoediting of recurrent cancer mutations

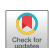

## Article

# Prediction of neo-epitope immunogenicity reveals TCR recognition determinants and provides insight into immunoediting

Julien Schmidt,<sup>1,8</sup> Angela R. Smith,<sup>2,8</sup> Morgane Magnin,<sup>1</sup> Julien Racle,<sup>3,4</sup> Jason R. Devlin,<sup>2</sup> Sara Bobisse,<sup>1</sup> Julien Cesbron,<sup>1</sup> Victor Bonnet,<sup>5</sup> Santiago J. Carmona,<sup>3,4</sup> Florian Huber,<sup>1</sup> Giovanni Ciriello,<sup>4,6</sup> Daniel E. Speiser,<sup>3</sup> Michal Bassani-Sternberg,<sup>1</sup> George Coukos,<sup>1</sup> Brian M. Baker,<sup>2,\*</sup> Alexandre Harari,<sup>1,7,\*</sup> and David Gfeller<sup>3,4,8,9,\*</sup>

<sup>1</sup>Department of Oncology, Ludwig Institute for Cancer Research Lausanne, University Hospital of Lausanne, Lausanne, Switzerland

<sup>2</sup>Department of Chemistry and Biochemistry and the Harper Cancer Research Institute, University of Notre Dame, Notre Dame, IN, USA

<sup>3</sup>Department of Oncology, Ludwig Institute for Cancer Research Lausanne, University of Lausanne, Lausanne, Switzerland

<sup>4</sup>Swiss Institute of Bioinformatics (SIB), Lausanne, Switzerland

<sup>5</sup>Nextthink, Prilly, Switzerland

<sup>6</sup>Department of Computational Biology, University of Lausanne, Lausanne, Switzerland

<sup>7</sup>Center of Experimental Therapeutics, Department of Oncology, Centre Hospitalier Universitaire Vaudois, Lausanne, Switzerland

<sup>8</sup>These authors contributed equally

<sup>9</sup>Lead contact

\*Correspondence: [brian-baker@nd.edu](mailto:brian-baker@nd.edu) (B.M.B.), [alexandre.harari@chuv.ch](mailto:alexandre.harari@chuv.ch) (A.H.), [david.gfeller@unil.ch](mailto:david.gfeller@unil.ch) (D.G.)

<https://doi.org/10.1016/j.xcrm.2021.100194>

## SUMMARY

CD8+ T cell recognition of peptide epitopes plays a central role in immune responses against pathogens and tumors. However, the rules that govern which peptides are truly recognized by existing T cell receptors (TCRs) remain poorly understood, precluding accurate predictions of neo-epitopes for cancer immunotherapy. Here, we capitalize on recent (neo-)epitope data to train a predictor of immunogenic epitopes (PRIME), which captures molecular properties of both antigen presentation and TCR recognition. PRIME not only improves prioritization of neo-epitopes but also correlates with T cell potency and unravels biophysical determinants of TCR recognition that we experimentally validate. Analysis of cancer genomics data reveals that recurrent mutations tend to be less frequent in patients where they are predicted to be immunogenic, providing further evidence for immunoediting in human cancer. PRIME will facilitate identification of pathogen epitopes in infectious diseases and neo-epitopes in cancer immunotherapy.

## INTRODUCTION

The CD8+ T cell immune response is key to recognize and kill infected and malignant cells. Over the last decade, the success of cancer immunotherapy demonstrated that harnessing and boosting CD8+ T-cell-mediated control and elimination of cancer cells is clinically relevant.<sup>1–4</sup> A remaining central question is why some peptides specifically expressed by infected or cancer cells and displayed on class I human leukocyte antigen (HLA-I) molecules are recognized by CD8+ T cells and elicit specific immune responses while others do not, as the former provide ideal targets for vaccines<sup>1,3,5</sup> and T-cell-based therapies.<sup>2</sup> Unfortunately, even the latest machine learning epitope prediction tools display low accuracy, with a precision typically around or lower than 5% when applied to neo-epitope predictions from mutations identified by exome sequencing in cancer.<sup>5–9</sup>

At the molecular level, CD8+ T cell recognition of peptide epitopes is based on a series of specific events.<sup>10</sup> First, the peptide is cleaved from the source protein by the proteasome, is transported into the endoplasmic reticulum (ER) and binds to HLA-I molecules. HLA-I molecules bind 8- to 12-mer peptides, are

mainly encoded by three genes (HLA-A/B/C), and are highly polymorphic across the human population. Upon stable binding, the peptide-HLA-I (pHLA) complex is presented on the surface of cells. Second, the T cell receptor (TCR) can bind to the pHLA complex, which initiates the formation of the immune synapse and ultimately can lead to the killing of infected or malignant cells.

Much work has been done to characterize the binding (either affinity or stability) and presentation of peptides on HLA-I molecules, and several HLA-I ligand predictors are publicly available.<sup>11–16</sup> These tools primarily focus on binding to HLA-I, which is the most selective and arguably the best understood step in antigen presentation. Several approaches demonstrated further improvement in predictions by integrating signals from cleavage and antigen transport, presentation hotspots, gene expression of the source protein, or clonality of the mutations for cancer neo-epitopes.<sup>16–21</sup> However, these additional features are not always experimentally available in typical studies of pathogen or cancer epitopes, and some can be confounded by tumor purity or sequencing protocols. Importantly, information about whether the pHLA complexes are recognized by CD8+ T cells is typically not included in the training of these tools.

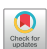

Less is known about the rules determining whether a pHLA complex can be recognized by CD8+ T cells. In cancer neo-epitope analyses, some studies observed that agretopicity, defined as the ratio between the affinity for HLA-I of the mutated and the wild-type (WT) peptide, has predictive power for immunogenicity,<sup>8,22</sup> especially when the mutations fall on anchor positions.<sup>23</sup> Similarity to existing epitopes (also referred to as foreignness) was also proposed as a way to improve selection of neo-epitope candidates.<sup>8,19,24</sup> Other studies considered dissimilarity-to-self based on the hypothesis that mutated neo-epitopes similar to unmodified peptides are less likely to elicit T cell recognition due to central tolerance.<sup>25,26</sup> However, it can be challenging to properly define DisToSelf in the context of TCR recognition.<sup>27</sup> Studies focusing mainly on pathogens and cancer testis antigens suggested that peptide hydrophobicity plays a role in TCR recognition,<sup>28</sup> although these results are not fully consistent with those of other studies.<sup>29</sup> Moreover, these two approaches are not widely used in today's class I epitope prediction pipelines.

Improved predictions of immunogenicity, defined here as evidence of recognition by some CD8+ T cells, will have several applications. From a clinical point of view, it will facilitate the development of peptide-based T cell vaccines in infectious diseases or personalized cancer immunotherapy.<sup>1,3,30</sup> From a more fundamental point of view, it can guide mechanistic understanding of the molecular and biophysical determinants of TCR recognition. Moreover, it could provide insight into immune pressure acting on cancer mutations in human, a process often referred to as immunoediting,<sup>31</sup> by taking advantage of large cancer genomics datasets available from thousands of patients.<sup>32</sup> Unfortunately, both the limited accuracy of existing epitope predictors and the difficulty of building *in silico* models fully capturing cancer mutagenesis processes in the absence of immune selection make it challenging to use cancer genomics studies for analyzing immunoediting in human tumors.<sup>33</sup>

Here, we capitalize on recent (neo-)epitope data to train a predictor of immunogenic epitopes (PRIME). Unlike studies mainly focusing on HLA-I binding or antigen presentation,<sup>13,15–17,34,35</sup> our approach is able to disentangle HLA-I binding from molecular TCR recognition propensity. This is accomplished by a careful annotation and analysis of epitope residues with minimal impact on binding to HLA-I molecules. Our results show that biophysical properties of TCR-pHLA interactions can be learned in this way, improve prediction of neo-epitopes, and lead to a better molecular understanding of the molecular determinants of TCR recognition. Looking at cancer genomics data, we observe that recurrent mutations tend to be less frequent in patients where they are predicted to be immunogenic, demonstrating that PRIME predictions are consistent with immunoediting in human cancer.

## RESULTS

### Immunogenicity predictions beyond binding and presentation on HLA-I molecules

To develop accurate immunogenicity prediction tools that capture biophysical aspects of TCR recognition, we compiled and curated a dataset of 4,958 peptides derived from pathogens or cancer testis antigens (1,153 immunogenic and 476 non-immu-

nogenic) as well as cancer mutations (129 immunogenic and 3,200 non-immunogenic) that were experimentally tested for immunogenicity in multiple studies in human (Figure 1A; STAR methods; Table S1).<sup>36–46</sup>

Among mutated peptides tested in cancer neo-epitope studies, we observed similar HLA-I allele coverage in the immunogenic and non-immunogenic peptides (Figure 1B). As expected, the over-representation of HLA-A\*02:01 epitopes was stronger when including data from pathogens and cancer testis antigens (Figure S1A). We also observed slightly more 9-mers among immunogenic peptides (Figure S1B). This may be due to the fact that longer peptides bulging out of the HLA-I binding site could interfere with TCR binding, although we cannot exclude that some studies reporting mainly immunogenic epitopes were restricted to 9-mers.

We then examined how existing predictors could distinguish immunogenic from non-immunogenic mutated peptides in cancer neo-epitope studies. As expected, our results show that neo-epitopes were enriched in peptides with better binding to HLA-I predicted by either MixMHCpred,<sup>12</sup> NetMHCpan<sup>15</sup> with eluted ligands (NetMHCpanEL) or binding affinity (NetMHCpanBA) predictions, MHCflurry,<sup>13</sup> HLATHENA,<sup>16</sup> or NetMHCstabpan<sup>14</sup> (Figures 1C and S1C). This is the case even if most peptides used in this benchmark, including the non-immunogenic ones, had been preselected based on binding affinity predictions. We next explored predictors related to antigen processing, TCR recognition, or immune tolerance. The predicted cleavage (NetChop),<sup>47</sup> the predicted antigen transport (TAP),<sup>48</sup> and the predicted immunogenicity (IEDB.imm)<sup>29</sup> had limited power to predict immunogenicity (Figure 1C). The ratio of binding affinity between the mutant and the WT peptides did not reach statistical significance either, and the trend was mainly driven by mutations observed at anchor positions, where the ratio correlates most with the actual binding affinity (Figures S1D and S1E). The dissimilarity-to-self (DisToSelf) (STAR methods) demonstrated some statistical power to distinguish immunogenic from non-immunogenic cancer mutated peptides (Figure 1F). The recent method of Wells et al. (TESLA; STAR methods) that combines antigen presentation with agretopicity and peptide foreignness displayed similar enrichment as HLA-I ligand predictors (Figure 1C) and similar precision (Figure S1F).

To explore other peptide-intrinsic properties that may be important for TCR binding and recognition and avoid confounding factors related to affinity to HLA-I, we annotated for each HLA-I allele the positions in ligand sequences with minimal impact on HLA-I affinity (referred to as MIA positions) and that can potentially interact with the TCR (Figure 1D). To this end, we capitalized on our set of curated HLA-I motifs.<sup>12</sup> For every allele, we selected specific positions between the fourth (P4) and the second to last (P $\Omega$ -1) that displayed low specificity (STAR methods; Table S2). The amino acid preferences at these positions are much less influenced by the binding to HLA-I, thereby preventing an important confounding factor when analyzing TCR binding and recognition. These amino acid frequencies were minimally correlated with predicted affinity to HLA-I (Figure S1G). We then combined the predicted binding to HLA-I (encoded as MixMHCpred  $-\log(\%rank)$ ) with the frequency of each amino acid at these positions (i.e., 1+20

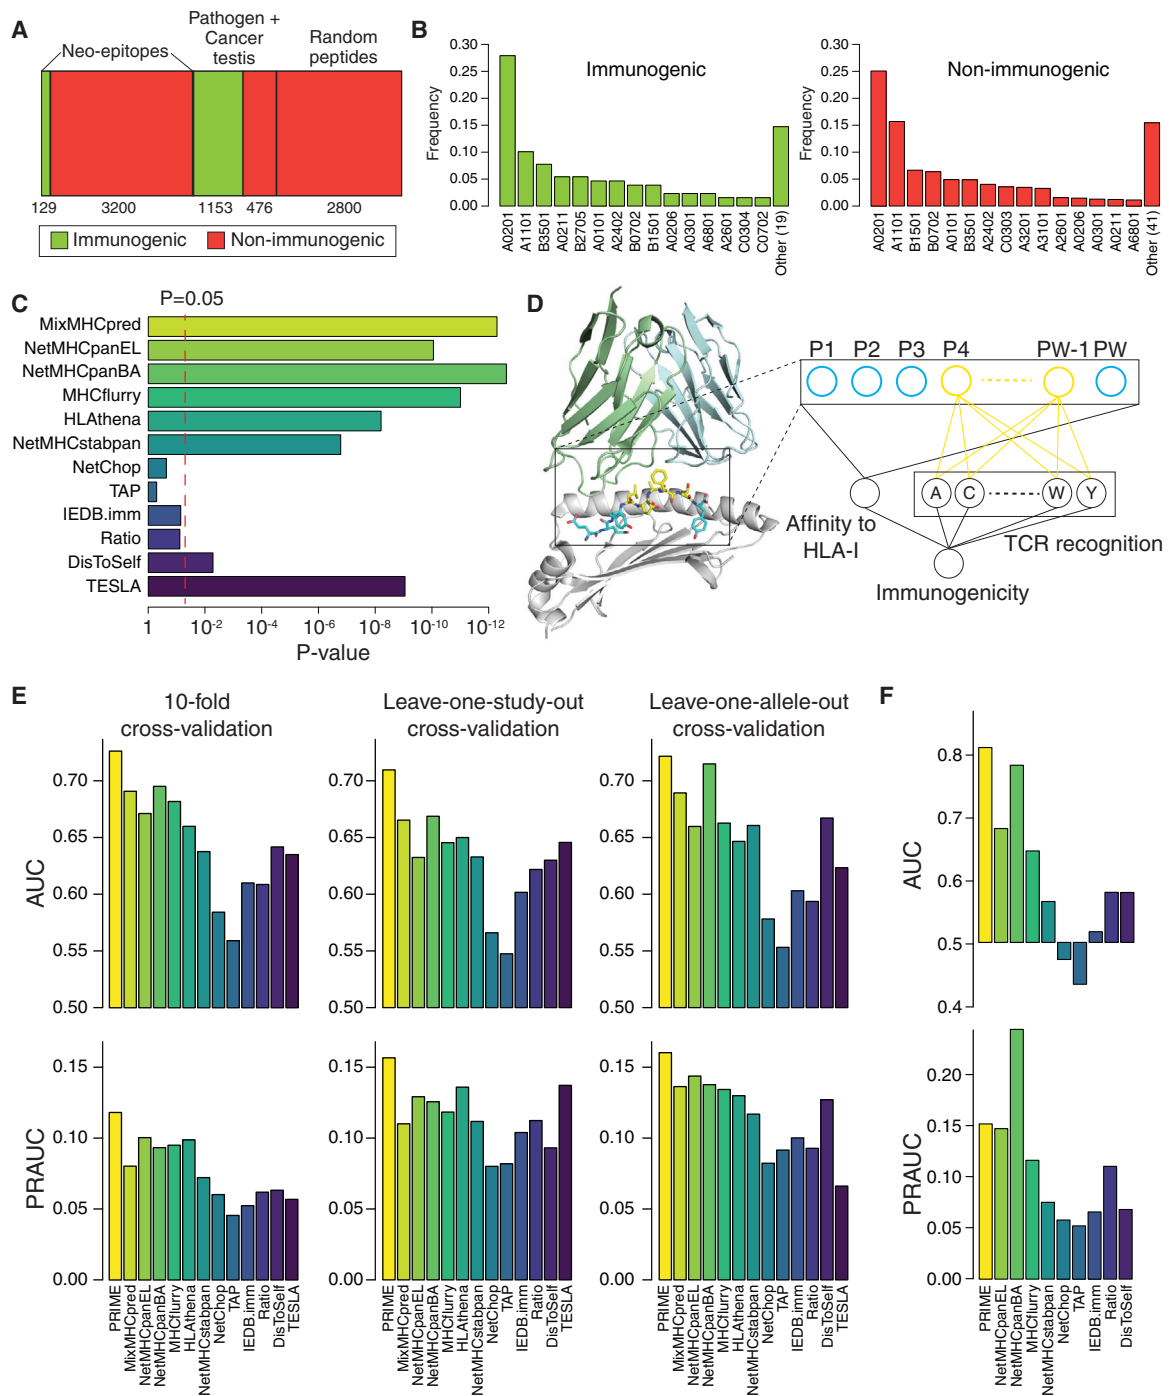

**Figure 1. Immunogenicity predictions beyond binding and presentation on HLA-I molecules**

(A) Summary of the data used to benchmark existing tools and develop our new immunogenicity predictor.

(B) Allelic coverage in the immunogenic and non-immunogenic mutated peptides tested in cancer neo-epitope studies for the 15 most frequent HLA-I alleles. “Other (*n*)” indicates the cumulative frequency of the *n* remaining HLA-I alleles.

(C) Ability of existing predictors to distinguish between immunogenic and non-immunogenic mutated peptides in cancer neo-epitope studies. The x axis shows the p values of the Wilcoxon test between immunogenic and non-immunogenic peptides for the scores of each predictor (see Figure S1C).

(D) Graphical representation of the immunogenicity predictor combining affinity to HLA-I and TCR binding signals. P<sub>Ω</sub> stands for the position of last epitope residue. Residues at MIA positions (P4 to P<sub>Ω</sub>-1 in this example with HLA-B\*44:03) are shown in yellow, and other epitope residues are shown in blue. The HLA is shown in gray and the TCR in light blue and light green.

(E) AUC and PRAUC values of the 10-fold cross-validation (left), the leave-one-study-out cross-validation (middle), and the leave-one-allele-out cross-validation (right).

(F) AUC and PRAUC values obtained based on mouse neo-epitopes from Capietto et al.<sup>23</sup>



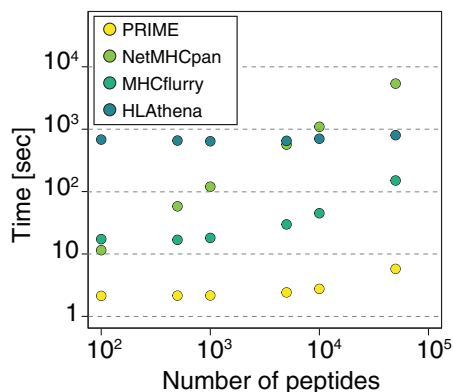

**Figure 2. PRIME runs faster than other HLA-I ligand predictors**  
Computational efficiency of PRIME and different HLA-I ligand predictors for predictions with 6 HLA-I alleles.

dimensional vector) to train a predictor of immunogenic epitope (PRIME) using a logistic regression (STAR methods; Figure 1D). Peptides with a predicted binding to HLA-I higher than a threshold  $T$  ( $T = 5\%$  on %rank) were further given a score of 0 in the logistic regression, because they are very unlikely to bind to HLA. The same thresholding was applied to the other predictors. 10-fold cross-validation (Figure S2A) for all mutated peptides in neo-epitope studies demonstrated improvement with PRIME compared to other predictors both in terms of area under the receiver operative curve (AUC) and area under the precision-recall curve (PRAUC) (Figure 1E). Standard cross-validation results can be artificially boosted by batch effects because different peptides from the same study are found in both the training and testing sets. To overcome this issue, we selected the seven neo-epitope studies with at least five experimentally validated positives and negatives and performed a leave-one-study-out cross-validation (Figure S2A). Our results demonstrated improved prediction accuracy with PRIME (Figure 1E; Table S3). To exclude biases due to higher frequency of specific HLA-I alleles, we performed a leave-one-allele-out cross-validation across the nine alleles with at least 5 experimentally validated positives and negatives in our neo-epitope dataset (Figure S2A). Here again, PRIME performed better than other tools (Figure 1E; Table S3).

To further investigate the importance of both affinity to HLA and amino acids at MIA positions, we trained PRIME only with the frequencies of amino acids at MIA positions. The performance was much lower (Figure S2B). We then attempted to randomize the amino acids at MIA positions and retrained PRIME on such data (STAR methods). Our results show that predictions became less accurate (Figure S2B).

We next investigated the effect of combining NetChop, TAP, IEDB.imm, or DisToSelf with affinity to HLA-I (MixMHCpred). In general, the combinations were better than the single predictors but less accurate than PRIME with only one exception (AUC for MixMHCpred combined with DisToSelf in the leave-one-allele-out cross-validation; Figure S2C). When combining these four different predictors with PRIME, we observed mainly similar or lower performance, with again the exception of combining

PRIME with DisToSelf in the leave-one-allele-out cross-validation (Figure S2D). Using the threshold on binding affinity or not had limited impact on the performance of PRIME and HLA-I ligand predictors but more impact on other predictors, as expected (Figure S2E).

We then asked whether PRIME could also be used for predicting mouse neo-epitopes in the study of Capietto et al.,<sup>23</sup> where 409 mutated peptides identified by exome sequencing have been tested for immunogenicity. In terms of AUC, PRIME outperformed existing tools that can be used with mouse major histocompatibility complex (MHC) alleles. The difference with NetMHCpanBA was modest, and NetMHCpanBA displayed better PRAUC (Figure 1F), although this comparison may be biased by the fact that the peptides experimentally tested in Capietto et al. had been preselected based on binding affinity predictions with NetMHCpan. MixMHCpred and HLAtlanta were not included because mouse MHC alleles are not available with these tools. Half-lives predicted by NetMHCstabpan were always lower than the 1.4h threshold derived in Wells et al.,<sup>8</sup> preventing us to compute AUC and PRAUC values for the TESLA method.

In terms of computational efficiency, PRIME runs 10 times faster than MHCflurry and from 10 to 1,000 times faster than NetMHCpan and HLAtlanta (Figure 2). This makes it especially appropriate to score large datasets of potential epitopes.

### PRIME correlates with structural avidity

Given that PRIME is capturing determinants of TCR recognition propensity, we hypothesized that it could also correlate with structural avidity of CD8+ T cells, which is a more quantitative measure of peptide immunogenicity.<sup>49</sup> To this end, we used proprietary fluorescence-activated cell sorting (FACS)-based NTamer technology to determine the monomeric pHLA-TCR dissociation rate (half-life [ $t_{1/2}$ ]), a physical parameter correlated with T-cell potency.<sup>50,51</sup> We analyzed multiple CD8+ T cells with distinct TCRs recognizing thirteen known epitopes, including viral, tumor associated, and neo-epitopes (Figure S3A; Table S4A; STAR methods). PRIME predictions were significantly correlated with half-lives, while no significant correlation could be observed with affinity, stability, cleavage, TAP, or immunogenicity predictors (Figure 3). Significant correlations could be seen with DisToSelf, although this analysis may be influenced by the mixing of immunodominant pathogen epitopes with cancer epitopes, and the correlation mainly reflects the separation between pathogen and cancer epitopes. Of note, the ratio and the TESLA predictions were not included because they can only be applied to neo-epitopes. The version of PRIME trained without predicted affinity resulted in lower performance (Figure S3B). We further measured the cytolytic activity of T cell clones, recognizing eleven of the different epitopes by *in vitro* killing assay ( $EC_{50}$ ; STAR methods; Table S4B). In this case, PRIME displayed higher correlation than other predictors, although no tool reached statistical significance (Figure S3C). Overall, our results indicate that PRIME can be used to prioritize epitopes of high structural avidity, which are most promising for vaccine design and personalized cancer immunotherapy.

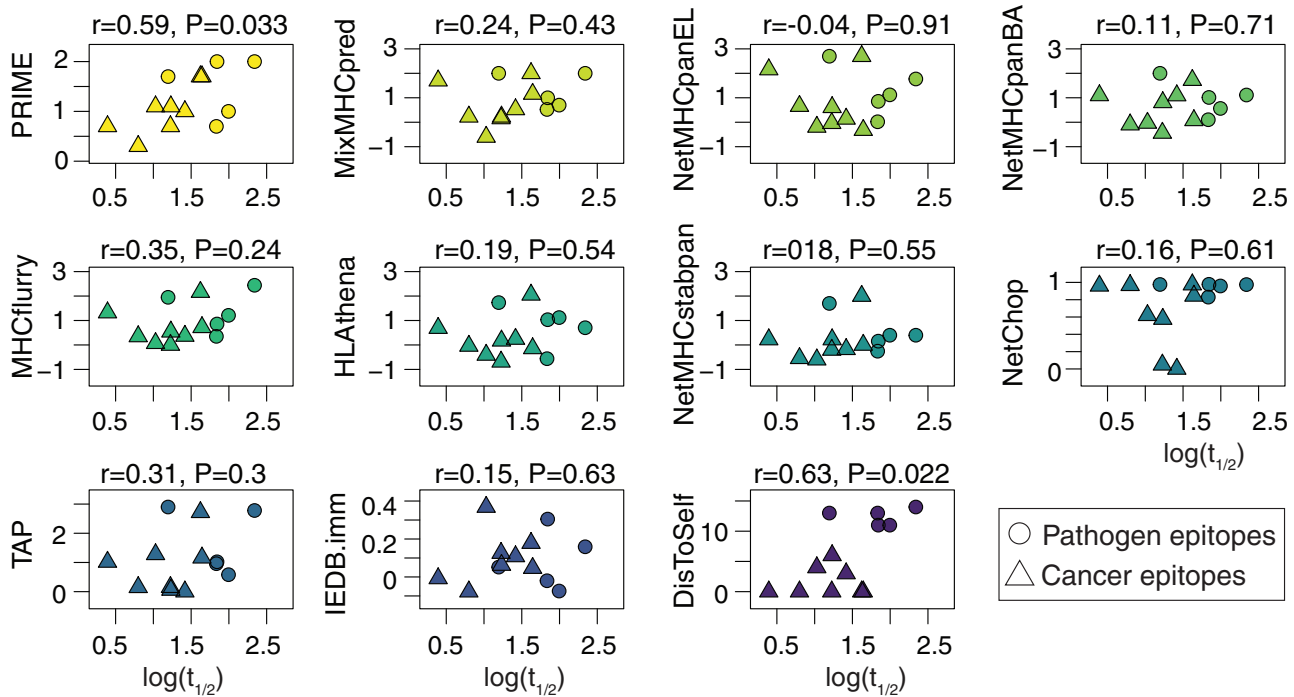

**Figure 3. PRIME correlates with structural avidity**

Correlation between structural avidity (i.e., monomeric pHLA-TCR dissociation kinetics;  $t_{1/2}$ ) and the predictions of the different tools. Pearson correlation coefficients and p values are shown above each plot. Each point corresponds to the average  $\log(t_{1/2})$  of different clones (Table S4A).

### PRIME reveals determinants of TCR recognition

To gain insights into the molecular mechanisms underlying the improved predictions of immunogenicity with PRIME, we plotted the coefficients of the logistic regression corresponding to amino acids at MIA positions. We observed a striking correspondence with biophysical properties of amino acids. In particular, the three aromatic amino acids (W, F, and Y) showed the highest values, followed by the three other most hydrophobic ones (V, L, and I), whereas charged amino acids (especially R, K, and E) as well as Q, which are characterized by long and charged/polar sidechains, showed the opposite trend (Figure 4A). The same pattern was observed when training PRIME with different affinity predictors and a similar trend was seen when excluding peptides restricted to HLA-A\*02:01 (Figure S4A). A similar trend was also observed when considering the frequency of amino acids at MIA positions in neo-epitopes, normalized either by the one in human proteins or the one in non-immunogenic cancer mutant peptides with the same distribution of predicted affinity to HLA-I, the same HLA-I allele distribution and the same peptide length distribution as the neo-epitopes (Figure S4B).

To investigate whether PRIME truly captures properties related to TCR binding and recognition and not merely provides a better model of binding to HLA, we computed the amino acid frequency at MIA positions in naturally presented HLA-I ligands with the same allele/length distribution, normalized by the expected amino acid frequency in their source proteins (STAR methods). A distinct ranking of amino acids was observed with no enrichment in aromatic or hydrophobic residues (Figure S4C). We further attempted to predict HLA-I ligands coming from 10

samples not used in the training of MixMHCpred. MixMHCpred performed better than PRIME in all samples (Figure S4D), further indicating that the improvement in immunogenicity predictions with PRIME is likely not due to better predictions of binding to HLA-I.

The results of Figure 4A recapitulate some observations from previous studies but also highlight important discrepancies. For instance, in Chowell et al.,<sup>28</sup> W and F were only slightly correlated with immunogenicity and Y was negatively correlated with immunogenicity, whereas C was the most over-represented amino acid among immunogenic peptides. In Calis et al.,<sup>29</sup> charged amino acids, such as E or R, contributed positively to immunogenicity, whereas L and Y had a negative contribution. The correlation between the immunogenicity propensity determined in Calis et al.<sup>29</sup> and the data in Figure 4A did not reach statistical significance ( $\rho = 0.38$ ;  $p = 0.101$ ; Figure S4E).

To experimentally validate these results, we selected two viral HLA-A\*02:01-restricted epitopes (ALIRILQQL from HIV and NLVPMVATV from CMV) and replaced the peptide residue at position 5 with each other amino acid. Position 5 is known to have limited impact on binding affinity to HLA-A\*02:01, thereby providing a well-suited test case for our immunogenicity predictions (Figures S4F and S4G). To assess the relative immunogenicity of the different peptide variants, naive CD8+ T cells were isolated from three HLA-A\*02:01-positive healthy donors and stimulated *in vitro* with each peptide separately (STAR methods; Figure S4H; Table S4C). In two out of three donors, variants showing high immunogenicity, as determined by interferon gamma (IFN $\gamma$ ) ELISpot, were enriched in residues predicted to

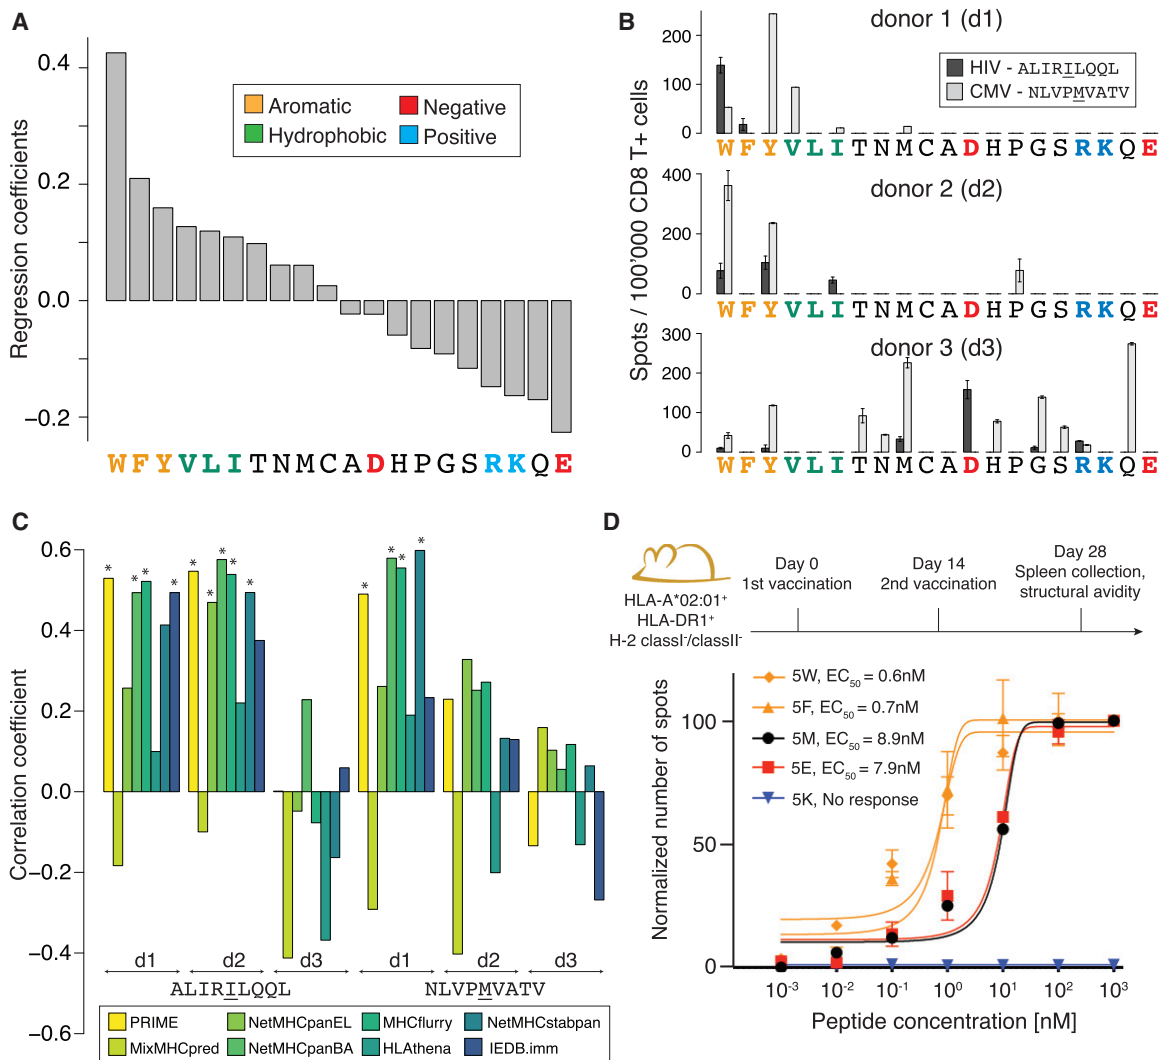

**Figure 4. PRIME reveals molecular determinants of TCR recognition**

(A) Ranking of the coefficients in PRIME corresponding to amino acids at MIA positions.

(B) IFN $\gamma$ -ELISpot signals obtained after stimulating naive CD8 $^+$  T cells from three healthy donors (d1, d2, and d3) with all P5 variants of the HIV (ALIRILQQL) and CMV (NLVPMVATV) epitopes (two technical replicates).

(C) Spearman correlation coefficients between immunogenicity predictions and IFN $\gamma$  ELISpot signals for P5 variants of the HIV and CMV epitopes from each donor. Stars indicate Spearman correlation p values smaller than 0.05.

(D) Functional avidity of CD8 $^+$  T cell responses ( $EC_{50}$ ) measured for five variants of the CMV epitopes used to vaccinate HLA-A\*02:01 transgenic mice (4–7 biological replicates). Data were renormalized for each epitope based on the signal at 10 $^3$  nM. No response was detected for the peptide with K at P5 (values of 0 are shown).

confer high immunogenicity, with the only exception of a weak response for the proline variant of the CMV epitope in donor 2 (Figure 4B). When correlating the immunogenicity of the distinct variants with different predictors, we observed significant correlations in three cases with PRIME, MHCflurry and NetMHCpanBA (Figure 4C). The other predictors were less successful at capturing the immunogenicity signal present in these data. The good performance of MHCflurry and NetMHCpanBA may be explained by the fact that binding affinity data used to train these algorithms are enriched in verified CD8 $^+$  T cell epitopes, unlike HLA peptidomics data, which only capture presentation

on HLA-I molecules and are the main source of training data for MixMHCpred, NetMHCpanEL, and HLAtHena. Similar improvements in predictions with PRIME could be observed when analyzing immunogenicity data for HLA-A\*02:01 restricted peptide analogs tested in Tangri et al. (Figure S4I; Table S4D).<sup>52</sup>

To see whether the higher immunogenicity of aromatic residues could also be observed *in vivo* in mouse, we vaccinated HLA-A\*02:01 transgenic mice separately with five variants at P5 of the CMV epitope (NLVPMVATV) and measured the functional avidity of T cell responses 14 days post-immunization (STAR methods). Our results confirm that aromatic sidechains

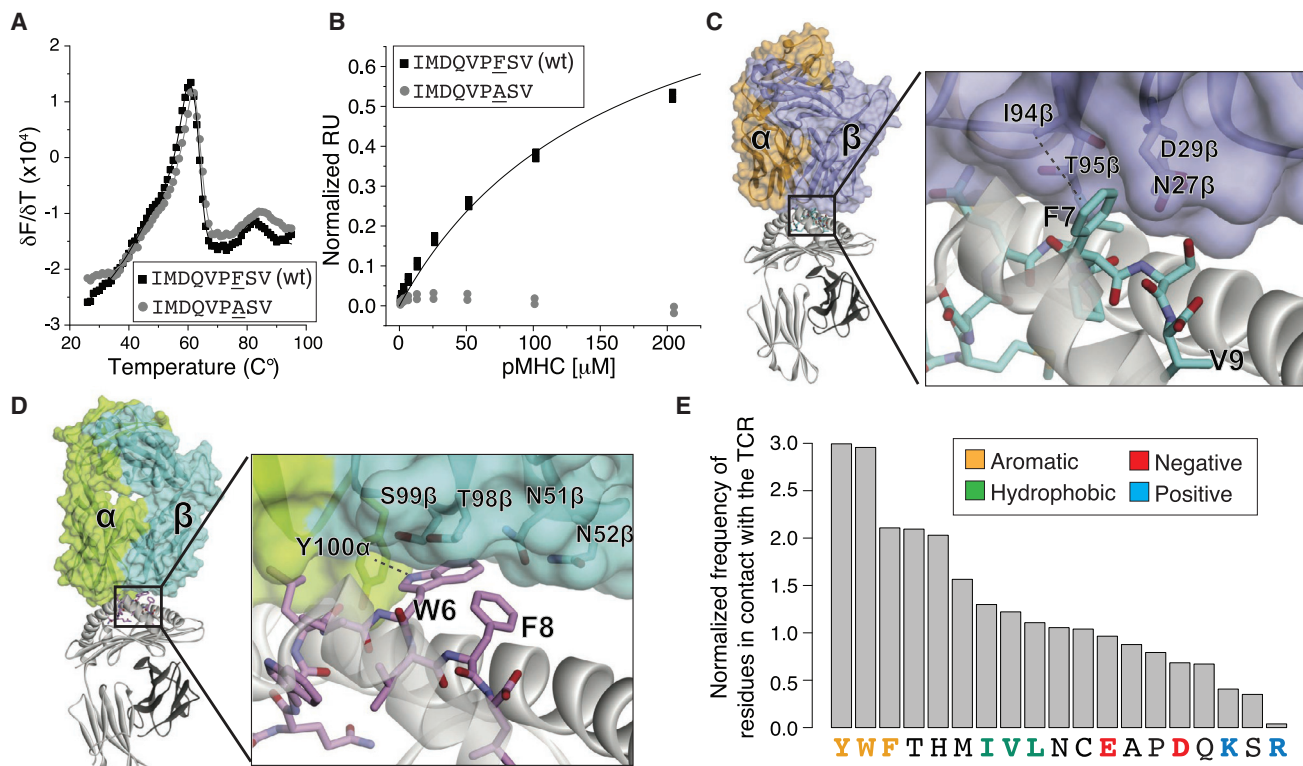

**Figure 5. TCR-pHLA structures provide molecular interpretations for the predictions of PRIME**

(A) HLA-A\*02:01 binding of the PMEL<sub>209(2M)-217</sub> epitope (IMDQVPFSV) and the F7A substitution (thermal stability measured by differential scanning fluorimetry). Solid lines represent bi-Gaussian fits to the data. The measured  $T_m$  values are  $61.9^\circ\text{C} \pm 0.2^\circ\text{C}$  for the epitope and  $61.7^\circ\text{C} \pm 0.2^\circ\text{C}$  for the F7A-modified epitope (fitted values with standard fitting errors). (B) Recognition of the PMEL<sub>209(2M)-217</sub> WT and F7A mutant by the SILV44 TCR. Solid line for the WT represents a 1:1 fit to the data, yielding a  $K_D$  of  $140 \pm 20 \mu\text{M}$  (average and standard deviation of three independent measurements). No detectable binding was observed for the F7A modified epitope. (C) Crystal structure of the SILV44 TCR in complex with PMEL<sub>209(2M)-217</sub> presented by HLA-A\*02:01. (D) Crystal structure of a TCR in complex with the HHAT<sub>68-76</sub> L75F neo-epitope (KQWLWVLF; PDB: 6UK4).<sup>27</sup> (E) Frequencies of 9-mer epitope residues with sidechains directly contacting TCR residues in TCR-pHLA X-ray structures, normalized by the amino acid frequencies in the source proteins.

(W and F) triggered the highest avidity, whereas the positively charged sidechain (K) resulted in a total lack of recognition for this peptide (Figure 4D). In this case, E and M displayed similar T cell recognition. It is important to realize that the observations of Figure 4A reflect a general propensity of molecular TCR recognition but do not exclude recognition of less immunogenic residues in specific contexts. In particular, the vast potential diversity of the TCR repertoire can result in recognition of sub-optimal residues, although with lower probability.

#### TCR-pHLA structures provide molecular interpretations for the predictions of PRIME

To structurally interpret the prevalent role of aromatic residues in TCR binding and recognition, we first considered a well-known HLA-A\*02:01 restricted tumor-associated antigen (ITDQVPFSV; PMEL<sub>209-217</sub>) that displayed an aromatic sidechain (F) at position 7. The peptide, along with the T2M variant, is recognized well by several TCRs,<sup>53</sup> including the PMEL<sub>209-217</sub>-specific TCR SILV44. The latter was studied recently for its therapeutic potential.<sup>54</sup> Consistent with the predictions of PRIME, substitution of phenylalanine at position 7 (P7) with alanine in the PMEL<sub>209(2M)-217</sub>

epitope did not impact binding to HLA-A\*02:01 (Figure 5A) but eliminated recognition by the SILV44 TCR (Figure 5B). To gain insights into the structural basis of this observation, we solved the X-ray structure of the SILV44-PMEL-HLA-A\*02:01 ternary complex (Table S5A; Figures S5A and S5B). Within the interface, the F7 sidechain inserts into a cleft on the TCR surface formed by sidechains and backbones of residues of CDR3 $\beta$  and CDR2 $\beta$  (Figure 5C). It forms a CH- $\pi$  hydrogen bond with I94 of CDR3 $\beta$  and 17 van der Waals contacts with the TCR, burying  $69 \text{ \AA}^2$  of solvent accessible surface area.

As a second example, we considered an ovarian cancer neo-epitope enriched in aromatic and hydrophobic residues (KQWLWVLF; HHAT<sub>68-76</sub>; L75F mutant)<sup>5</sup> in complex with a cognate TCR, for which we have recently solved the crystal structure.<sup>27</sup> Our structure indicated a prevalent role of the sidechain of W at P6 in the interaction with the TCR, including hydrophobic packing with sidechains of CDR3 $\alpha$  and CDR3 $\beta$  and a NH- $\pi$  hydrogen bond with Y100 of CDR3 $\alpha$  (Figure 5D). The mutated phenylalanine (F8) plays a less important role in the binding to the TCR compared to W6, mainly burying surface and making some hydrophobic contacts. These results indicate that T cell

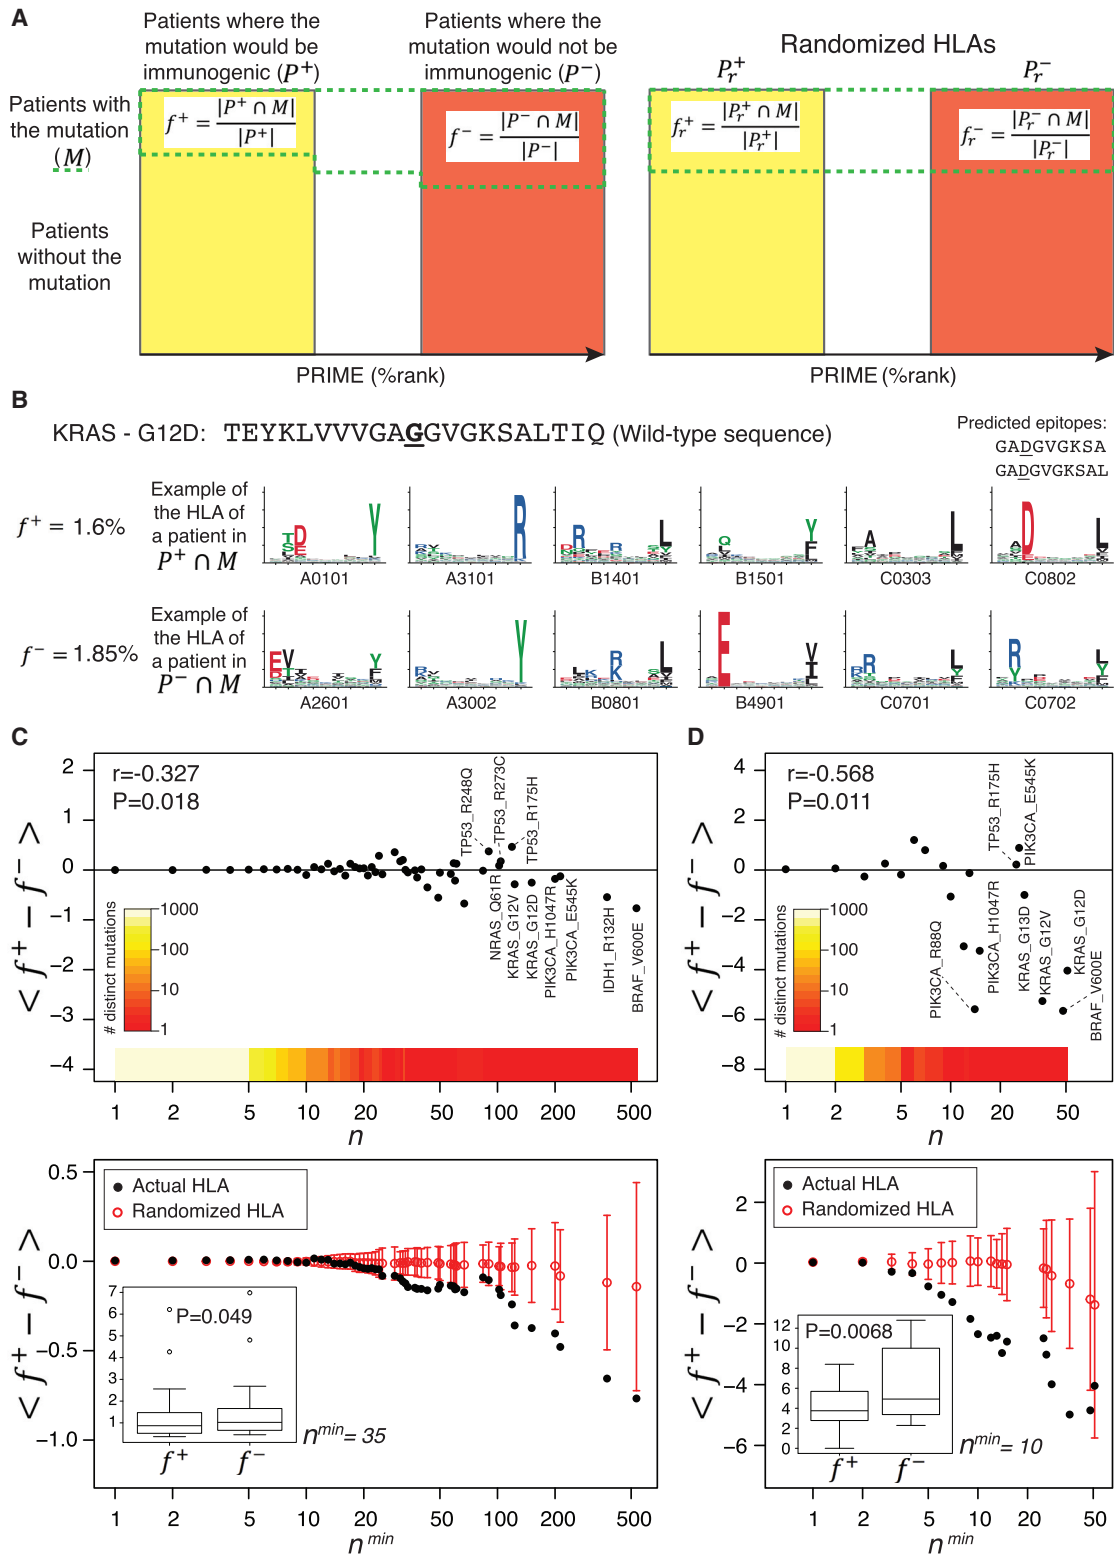

**Figure 6. PRIME provides insight into immunoediting in human cancer**

(A) Proposed framework to study immunoediting acting on cancer mutations. For each mutation, patients are stratified based on whether the mutation would be immunogenic ( $P^+$ , yellow rectangle) or would not ( $P^-$ , red rectangle). The actual frequency of the mutation is compared between these two groups

(legend continued on next page)



recognition of neo-epitopes is not restricted to mutations that specifically introduce new amino acids with much higher immunogenicity or stronger binding to HLA-I but also includes the situation where immunogenic amino acids are already present (W6 in this example) and mutations fall elsewhere on these epitopes.

We then surveyed publicly available X-ray structures of TCRs interacting with pHLA complexes (Table S5B). Consistent with the predictions of PRIME, we observed a clear enrichment of aromatic sidechains and a depletion of charged sidechains among epitope residues directly interacting with the TCR (Figure 5E; STAR methods). The correlation between the ranking of amino acids of Figure 4A and the one in Figure 5E was highly significant ( $\rho = 0.81$ ;  $p = 1.03 \times 10^{-5}$ ), despite the limited number of epitopes with available X-ray structures used to estimate amino acid frequencies in Figure 5E. In many of the TCR structures, the peptide aromatic residues penetrate between the TCR loops, forming a variety of interactions, as demonstrated by the large buried solvent-accessible surface areas (Figures S5C and S5D; Table S5C).

### PRIME provides insight into immunoediting in human cancer

One of the hallmarks of cancer is the ability to escape immune recognition. This can be achieved by several mechanisms, such as physical barriers preventing T cell infiltration, establishment of an immuno-suppressive microenvironment, downregulation or alteration of the antigen presentation machinery,<sup>55</sup> or negative selection of mutations giving rise to neo-epitopes—the so-called immunoediting.<sup>31,56</sup>

Here, we hypothesized that the ability of PRIME to integrate presentation on HLA-I and TCR recognition could be useful to investigate immunoediting in immunotherapy-naive tumors in human. Practically, we took advantage of the diversity of HLA-I alleles in the human population and reasoned that cancer mutations should undergo higher immune selective pressure (and therefore show lower frequency) in patients where they have higher probability to give rise to immunogenic neo-epitopes (Figure 6A).<sup>57</sup> To explore this hypothesis, we collected non-synonymous mutations found in The Cancer Genome Atlas (TCGA) and predicted the PRIME score with all HLA-I alleles of each patient (STAR methods). For each mutation, we compared its frequency among patients where it would give rise to neo-epitopes ( $f^+$ ) with its frequency among patients where it would not ( $f^-$ ; Figures 6A and 6B; STAR methods). For rare mutations with a low number ( $M$ ) of occurrences in the TCGA cohort, we observed no differences between  $f^+$  and  $f^-$  (Figure 6C). However, as the number of occurrences of the mutations in the TCGA cohort increased,

the mutations started to display lower frequency in patients where they would give rise to neo-epitopes (Figure 6C). These results indicate that recurrent mutations, which are often oncogenic, tend to be less frequent among patients where they would give rise to neo-epitopes. Consistent with previous studies,<sup>57,58</sup> the trend is especially strong in colorectal cancer, suggesting that this tumor type may be especially prone to immunoediting (Figures 6D and S6A). To further test the robustness of our model, we reasoned that the trend should be sensitive to the actual HLA-I typing of the patients.<sup>57</sup> The red circles and error bars in Figures 6C and 6D show the results obtained after randomly shuffling the HLA-I alleles in TCGA patients (STAR methods). As expected, the trend was much weaker after shuffling HLA-I alleles.

We further attempted to investigate the potential effect of gene expression, clonality, and deleterious alterations in the antigen processing machinery (STAR methods). To this end, we restricted the analysis to patients for which expression data were available. For a given mutation, patients for which the source gene of the mutation was poorly expressed, for which the mutation was predicted to be sub-clonal, or with deleterious alterations in antigen processing machinery were removed from the set of patients with the mutation ( $M$  in Figure 6A) and frequencies were recomputed. An even slightly stronger trend could be observed, demonstrating the robustness of our observations (Figure S6B). Reversely, the trend was no longer observed when considering for each mutation only patients with low expression of the source gene of the mutation, where the mutations were predicted to be sub-clonal or with deleterious alterations in antigen presentation genes (Figure S6C).

Taken together, our results indicate that recurrent mutations are on average less frequent in patients where they are predicted to give rise to neo-epitopes, and this association depends on the patient's HLA-I typing. For less common mutations, similar mutational frequencies are observed, and the values obtained with the actual HLA-I alleles of the patients overlap with those obtained after shuffling these alleles. Of note, the trend was weaker when using predictions only based on binding to HLA-I molecules, highlighting PRIME's ability to better highlight immunoediting acting on recurrent mutations (Figure S6D).

### DISCUSSION

Accurate prediction of neo-epitope immunogenicity is a cornerstone for rational vaccine design and personalized cancer immunotherapy. While most recent studies focused on improving

$(f^+ = (|P^+ \cap M| / |P^+|))$  and  $f^- = (|P^- \cap M| / |P^-|)$ , where  $M$  stands for the subset of patients where the mutation is observed). These frequencies will be further compared to those obtained after shuffling the HLA-I alleles between patients (i.e.,  $f_r^+$  and  $f_r^-$ ).

(B) Frequency of KRAS G12D mutation in patients where it would give rise to neo-epitopes ( $f^+$ ) and where it would not ( $f^-$ ), together with the example of HLA-I alleles of a patient with the mutation in  $P^+$  (upper row, with the two predicted epitopes) and one in  $P^-$  (lower row).

(C) Top: average value of  $f^+ - f^-$  for mutations observed  $N$  times ( $N = |M|$ ) in the TCGA cohort. The color scale shows the number of distinct mutations for all values of the mutation occurrence ( $N > 0$ ). Bottom: average value of  $f^+ - f^-$  for mutations observed at least  $N^{\min}$  times in the TCGA cohort is shown. The red circles and error bars correspond to randomized HLA-I alleles (mean and standard deviation of  $\langle f_r^+ - f_r^- \rangle$ ).

(D) Top: average value of  $f^+ - f^-$  for mutations observed  $N$  times in colorectal tumors of TCGA. Bottom: average value of  $f^+ - f^-$  for mutations observed at least  $N^{\min}$  times in colorectal tumors of TCGA is shown.

The insets in (C) and (D) show the boxplots of the frequencies  $f^+$  and  $f^-$  for all mutations observed at least  $N^{\min}$  times in our TCGA samples ( $N^{\min} = 35$  in C and  $N^{\min} = 10$  in D).  $r$  and  $p$  values shown in the top plots in (C) and (D) correspond to the Pearson correlation coefficient (STAR methods).  $p$  values shown in the insets of the bottom plots in (C) and (D) correspond to paired Wilcoxon tests. All frequencies are shown in percentages (%).



prediction of HLA-I binding and antigen presentation, we capitalized on recent (neo-)epitope data to train and validate a method that goes beyond binding to HLA-I molecules and captures molecular TCR recognition properties. PRIME not only improved prioritization of neo-epitopes but also correlated with structural avidity (Figure 3), which is promising to select optimal epitopes that could induce strong responses upon stimulation or vaccination.

Unlike previous approaches,<sup>29</sup> PRIME combines presentation on HLA-I molecules with peptide-intrinsic TCR recognition propensity, which resulted in improved prediction accuracy. Our work also helps rationalize why some peptides with low HLA-I affinity can be well recognized by CD8+ T cells, as weak pHLA affinity can be offset by strong TCR binding enabled by particularly immunogenic amino acids. Consistent with previous studies,<sup>8,19,24</sup> adding features linked to peptide foreignness or DisToSelf, which is an additional aspect of T cell recognition related to central tolerance and not considered in PRIME, may further improve predictions.

Our results reveal a convergence between immunogenicity and biophysical properties of amino acids. In particular, aromatic sidechains (i.e., W, F, and Y) showed the highest immunogenicity. These observations are attributable to the multifunctional properties of these aromatic side chains: while hydrophobic, they can also serve as hydrogen bond acceptors, pair with cations, engage in various stacking interactions, and possess limited rotational degrees of freedom. The corresponding bias against charged amino acids is explained similarly: burying charges within a protein interface is associated with energetically expensive desolvation penalties and necessitates precise alignments between opposing charges in the TCR.<sup>59</sup> This also explains the low immunogenicity of histidine, which can easily be protonated due to its  $pK_a$  of 6.0, close to physiological pH.

When considering naturally presented HLA-I ligands identified by mass spectrometry (MS) (Figure S4C), we observed a different pattern compared to Figure 4A, supporting our conclusion that PRIME captures signals related to TCR recognition and not to HLA-I binding or antigen presentation. Figure S4C revealed a strong depletion of cysteine as well as a depletion of tryptophan. These amino acids can be chemically modified,<sup>60</sup> which may explain why they are less well detected in peptides found by MS.<sup>17,34</sup> As such, we cannot exclude that PRIME also partly corrects the bias against tryptophan that is likely present in HLA-I ligand predictors trained on MS data, like MixMHCpred.

For all tools considered in this work, we used an *ad hoc* threshold based on predictions of binding to HLA and presentation. The underlying motivation was to avoid cases of peptides with very low affinity to HLA-I but with a stretch of immunogenic residues at MIA positions, as these may be underrepresented in the training set of PRIME. The value of the threshold is a free parameter in PRIME and setting it to lower %rank will increase specificity while decreasing sensitivity.

In some of our analyses, naive CD8 T cells were used to probe T cell reactivity (Figure 4B). The main reason was to avoid biases due to previous exposure with specific epitopes. As such, these experiments capture general properties of epitopes to be recognized by some TCRs found in the TCR repertoire. This is sometimes referred to as antigenicity, although a consensus on this terminology has not been reached in cancer neo-epitope studies.

The idea of using cancer genomics data to investigate immunoeediting mechanisms in human cancer has been explored in previous studies.<sup>32,57,61–63</sup> For instance, mutated peptides generated by recurrent oncogenic mutations were shown to have lower predicted binding to HLA-I molecules compared to those from less frequent mutations.<sup>32</sup> An important challenge in this type of analysis comes from the fact that non-synonymous cancer mutations display specific signatures reflecting a plethora of mechanisms, such as UV light, tobacco, DNA repair propensity, functional impact, codon degeneracy, etc.<sup>64</sup> Accurate models of mutagenesis processes in cancer that would recapitulate all these different mechanisms, except for the immune selection, are difficult to design, and any bias in these models can result in wrong interpretations when using them to compare with actual data.<sup>33</sup> The idea of stratifying patients based on the predicted immunogenicity of a mutation ensures that our findings do not rely on such theoretical models. This idea may therefore represent a powerful framework to explore immune pressure mechanisms in cancer, and our observations provide an independent validation of the results of Marty et al.<sup>32</sup>

Several reasons can explain the lack of signal detected for rare, mainly passenger, mutations. First, we cannot exclude that a certain fraction of these mutations are false-positives of mutation-calling algorithms. Second, immunoeediting may be more difficult to statistically detect with our approach. Third, it is expected that many passenger mutations appear later in tumorigenesis and undergo lower immune selection.<sup>32</sup> We also emphasize that negative selection of immunogenic mutations is only one of the multiple factors shaping the landscape of cancer mutations. This likely explains why we do not observe a complete absence of mutations in patients where they could give rise to immunogenic neo-epitopes (Figure 6C). This observation has important consequences for our understanding of tumor development and response to therapy. First, it confirms that several immunotherapy-naïve tumors can afford having mutations giving rise to neo-epitopes, including driver mutations, such as KRAS G12D.<sup>65</sup> Second, it may contribute to the success of cancer immunotherapy, because several immunogenic peptides will still be presented on cancer cells and could become clinically relevant upon boosting or engineering CD8+ T cells targeting them.

Investigation of the results obtained with each tumor separately (Figure S6A) demonstrated that a different trend was observed in melanoma (TCGA code: SKCM). Melanoma is among the tumors that are best recognized by T cells and show the best response rate to immunotherapy. Presentation of neo-antigens and cancer testis antigens is likely playing an important role in T cell recognition of tumors. As such, the lack of detectable immune selection of recurrent mutations in melanoma samples where they are predicted to be immunogenic is not inconsistent with the higher response rate observed in this tumor type.

The lack of signal observed for mutations poorly expressed, predicted to be sub-clonal, or found in patients with altered antigen presentation would be consistent with a lower immunoeediting (Figure S6C). However, it is important to realize that recurrent mutations are underrepresented within this set of mutations. Moreover, the filters that we used have limitations (e.g., expression can be biased by the presence of non-malignant cells, clonality is challenging to estimate with single biopsies, and

prediction of mutation functional effects, especially in HLA-I genes, is not fully reliable).

*In vivo* CD8+ T cell response against infected or cancer cells involves many other parameters beyond TCR binding (e.g., co-receptors, cytokines, T cell fitness, microenvironment, etc.). A holistic model of immunogenicity will ultimately need to integrate all of these aspects. However, many of these parameters are currently very difficult, if not impossible, to accurately measure experimentally in a clinical context, limiting the possibility to train and use such broad models for practical applications and quantitative predictions. By focusing on features that are readily available from peptide sequences, our immunogenicity predictor (<http://prime.gfellerlab.org/>) is suitable for large cohorts of patients in infectious diseases and cancer immunotherapy.

### Limitations of study

One limitation of this study comes from the fact that immunogenic peptides were defined as peptides recognized by some T cells in T-cell assays (e.g., IFN $\gamma$ -ELISpot). As such, our work uncovers properties of peptides that enhance their propensity to be physically recognized by TCRs (sometimes referred to as “antigenicity”) but does not robustly demonstrate that these peptides elicit a stronger response upon vaccination. This is likely one of the big, and currently unmet, challenges toward clinical applications of immunogenicity predictions in personalized cancer immunotherapy. A second limitation is that PRIME does not model the potential impact of central tolerance and therefore should preferentially be used on non-self peptides (e.g., mutated peptides in cancer or peptides from pathogens). Finally, although the set of verified neo-epitopes used in our benchmarks (i.e., 129 positives) is larger than in most recent neo-epitope prediction studies, it is still limited, and we anticipate that larger neo-epitope datasets will lead to additional refinements in immunogenicity predictions.

### STAR★METHODS

Detailed methods are provided in the online version of this paper and include the following:

- **KEY RESOURCES TABLE**
- **RESOURCE AVAILABILITY**
  - Lead contact
  - Materials availability
  - Data and code availability
- **EXPERIMENTAL MODEL AND SUBJECT DETAILS**
  - Animal experiments
  - Patients, Healthy donors and ethic statement
  - Cell lines and primary cells
- **METHOD DETAILS**
  - Collection of immunogenic and non-immunogenic peptides used for training PRIME
  - Existing epitope predictors used for benchmark
  - Training of the immunogenicity predictor PRIME
  - Cross-validation
  - Epitopes used for external validations
  - Computational efficiency

- Measurements of structural avidity (half-lives) and cytolytic activity (EC<sub>50</sub>) of antigen-specific CD8+ T cells
- Analysis of naturally presented HLA-I ligands
- Analysis of antigen-specific CD8+ T cells from healthy donors and cancer patients
- Peptides and pMHC NTAmers
- Mouse immunization
- Recombinant protein production and X-ray crystallography
- Analysis of TCR binding and peptide/HLA-A\*02:01 thermal stability
- Analysis of known X-ray structures
- Analysis of TCGA data
- Statistical model of immunoeediting
- **QUANTIFICATION AND STATISTICAL ANALYSIS**
  - Enrichment analysis for neo-epitopes
  - Half-lives and EC<sub>50</sub>
  - Correlation with ELISpot signals
  - Analysis of TCGA data
- **ADDITIONAL RESOURCES**

### SUPPLEMENTAL INFORMATION

Supplemental Information can be found online at <https://doi.org/10.1016/j.xcrm.2021.100194>.

### ACKNOWLEDGMENTS

We are thankful to Aymeric Auger for help with the FACS and Nathalie Rufer for sharing T cell clones. J.R.D. and B.M.B. acknowledge support from the National Institutes of Health (grants R35GM118166 andUL1TR002529). A.R.S. acknowledges support by a fellowship from the Walther Cancer Foundation Interdisciplinary Interface Training Project. J.R. and D.G. acknowledge support from the Swiss Cancer Research Foundation (KFS-4104-02-2017) and the University of Lausanne (Financement en Recherche Fondamentale). A.H. acknowledges support from the Swiss National Science Foundation (310030\_182384). We are thankful to the authors of HLAthena for sharing a command line executable of their methods. We are thankful for Rachel Marty for sharing HLA-I typing information of the TCGA samples. The results here are in whole or part based upon data generated by the TCGA Research Network: <https://www.cancer.gov/about-nci/organization/ccg/research/structural-genomics/tcga>.

### AUTHOR CONTRIBUTIONS

D.G. and A.H. designed the study; D.G. coordinated the project; D.G. performed the bioinformatics analyses; A.R.S., J.R.D., and B.M.B. performed the X-ray crystallography and TCR binding analyses; B.M.B., A.R.S., and D.G. analyzed protein structures; J.S., M.M., S.B., J.C., and A.H. performed the T cell assays; J.R., V.B., and D.G. developed the website; and J.R., S.J.C., D.E.S., G. Ciriello, M.B.-S., and G. Coukos provided reagents and feedback on the methods and manuscript. B.M.B. and D.G. wrote the manuscript.

### DECLARATION OF INTERESTS

The authors declare no competing interests. G. Ciriello is a member of the advisory board of *Cell Reports Medicine*.

Received: May 8, 2020

Revised: December 11, 2020

Accepted: January 11, 2021

Published: February 16, 2021

**REFERENCES**

- Ott, P.A., Hu, Z., Keskin, D.B., Shukla, S.A., Sun, J., Bozym, D.J., Zhang, W., Luoma, A., Giobbie-Hurder, A., Peter, L., et al. (2017). An immunogenic personal neoantigen vaccine for patients with melanoma. *Nature* *547*, 217–221.
- Rosenberg, S.A., and Restifo, N.P. (2015). Adoptive cell transfer as personalized immunotherapy for human cancer. *Science* *348*, 62–68.
- Sahin, U., Derhovanessian, E., Miller, M., Kloke, B.-P., Simon, P., Löwer, M., Bukur, V., Tadmor, A.D., Luxemburger, U., Schrörs, B., et al. (2017). Personalized RNA mutanome vaccines mobilize poly-specific therapeutic immunity against cancer. *Nature* *547*, 222–226.
- Zacharakis, N., Chinnasamy, H., Black, M., Xu, H., Lu, Y.-C., Zheng, Z., Pasetto, A., Langhan, M., Shelton, T., Prickett, T., et al. (2018). Immune recognition of somatic mutations leading to complete durable regression in metastatic breast cancer. *Nat. Med.* *24*, 724–730.
- Bobisse, S., Genolet, R., Roberti, A., Tanyi, J.L., Racle, J., Stevenson, B.J., Iseli, C., Michel, A., Le Bitoux, M.-A., Guillaume, P., et al. (2018). Sensitive and frequent identification of high avidity neo-epitope specific CD8<sup>+</sup> T cells in immunotherapy-naïve ovarian cancer. *Nat. Commun.* *9*, 1092.
- McGranahan, N., Furness, A.J.S., Rosenthal, R., Ramskov, S., Lyngaa, R., Saini, S.K., Jamal-Hanjani, M., Wilson, G.A., Birkbak, N.J., Hiley, C.T., et al. (2016). Clonal neoantigens elicit T cell immunoreactivity and sensitivity to immune checkpoint blockade. *Science* *351*, 1463–1469.
- Robbins, P.F., Lu, Y.-C., El-Gamil, M., Li, Y.F., Gross, C., Gartner, J., Lin, J.C., Teer, J.K., Clifton, P., Tycksen, E., et al. (2013). Mining exomic sequencing data to identify mutated antigens recognized by adoptively transferred tumor-reactive T cells. *Nat. Med.* *19*, 747–752.
- Wells, D.K., van Buuren, M.M., Dang, K.K., Hubbard-Lucey, V.M., Sheehan, K.C.F., Campbell, K.M., Lamb, A., Ward, J.P., Sidney, J., Blazquez, A.B., et al.; Tumor Neoantigen Selection Alliance (2020). Key parameters of tumor epitope immunogenicity revealed through a consortium approach improve neoantigen prediction. *Cell* *183*, 818–834.e13.
- Yadav, M., Jhunjhunwala, S., Phung, Q.T., Lupardus, P., Tanguay, J., Bumbaca, S., Franci, C., Cheung, T.K., Fritsche, J., Weinschenk, T., et al. (2014). Predicting immunogenic tumour mutations by combining mass spectrometry and exome sequencing. *Nature* *515*, 572–576.
- Neeffjes, J., Jongsma, M.L.M., Paul, P., and Bakke, O. (2011). Towards a systems understanding of MHC class I and MHC class II antigen presentation. *Nat. Rev. Immunol.* *11*, 823–836.
- Gfeller, D., and Bassani-Sternberg, M. (2018). Predicting antigen presentation-what could we learn from a million peptides? *Front. Immunol.* *9*, 1716.
- Gfeller, D., Guillaume, P., Michaux, J., Pak, H.-S., Daniel, R.T., Racle, J., Coukos, G., and Bassani-Sternberg, M. (2018). The length distribution and multiple specificity of naturally presented HLA-I ligands. *J. Immunol.* *201*, 3705–3716.
- O'Donnell, T.J., Rubinsteyn, A., and Laserson, U. (2020). MHCflurry 2.0: improved pan-allele prediction of MHC class I-presented peptides by incorporating antigen processing. *Cell Syst.* *11*, 42–48.e7.
- Rasmussen, M., Fenoy, E., Harndahl, M., Kristensen, A.B., Nielsen, I.K., Nielsen, M., and Buus, S. (2016). Pan-specific prediction of peptide-MHC class I complex stability, a correlate of T cell immunogenicity. *J. Immunol.* *197*, 1517–1524.
- Reynisson, B., Alvarez, B., Paul, S., Peters, B., and Nielsen, M. (2020). NetMHCpan-4.1 and NetMHCIIpan-4.0: improved predictions of MHC antigen presentation by concurrent motif deconvolution and integration of MS MHC eluted ligand data. *Nucleic Acids Res.* *48* (W1), W449–W454.
- Sarkizova, S., Klaeger, S., Le, P.M., Li, L.W., Oliveira, G., Keshishian, H., Hartigan, C.R., Zhang, W., Braun, D.A., Ligon, K.L., et al. (2020). A large peptidome dataset improves HLA class I epitope prediction across most of the human population. *Nat. Biotechnol.* *38*, 199–209.
- Abelin, J.G., Keskin, D.B., Sarkizova, S., Hartigan, C.R., Zhang, W., Sidney, J., Stevens, J., Lane, W., Zhang, G.L., Eisenhaure, T.M., et al. (2017). Mass spectrometry profiling of HLA-associated peptidomes in mono-allelic cells enables more accurate epitope prediction. *Immunity* *46*, 315–326.
- Lu, T., Wang, S., Xu, L., Zhou, Q., Singla, N., Gao, J., Manna, S., Pop, L., Xie, Z., Chen, M., et al. (2020). Tumor neoantigenicity assessment with CSiN score incorporates clonality and immunogenicity to predict immunotherapy outcomes. *Sci. Immunol.* *5*, eaaz3199.
- Łuksza, M., Riaz, N., Makarov, V., Balachandran, V.P., Hellmann, M.D., Solovyyov, A., Rizvi, N.A., Merghoub, T., Levine, A.J., Chan, T.A., et al. (2017). A neoantigen fitness model predicts tumour response to checkpoint blockade immunotherapy. *Nature* *551*, 517–520.
- Müller, M., Gfeller, D., Coukos, G., and Bassani-Sternberg, M. (2017). ‘Hotspots’ of antigen presentation revealed by human leukocyte antigen ligandomics for neoantigen prioritization. *Front. Immunol.* *8*, 1367.
- Stranzl, T., Larsen, M.V., Lundegaard, C., and Nielsen, M. (2010). NetCTLpan: pan-specific MHC class I pathway epitope predictions. *Immunogenetics* *62*, 357–368.
- Duan, F., Duitama, J., Al Seesi, S., Ayres, C.M., Corcelli, S.A., Pawashe, A.P., Blanchard, T., McMahon, D., Sidney, J., Sette, A., et al. (2014). Genomic and bioinformatic profiling of mutational neoepitopes reveals new rules to predict anticancer immunogenicity. *J. Exp. Med.* *211*, 2231–2248.
- Capietto, A.-H., Jhunjhunwala, S., Pollock, S.B., Lupardus, P., Wong, J., Hänsch, L., Cevallos, J., Chestnut, Y., Fernandez, A., Lounsbury, N., et al. (2020). Mutation position is an important determinant for predicting cancer neoantigens. *J. Exp. Med.* *217*, e20190179.
- Balachandran, V.P., Łuksza, M., Zhao, J.N., Makarov, V., Moral, J.A., Remark, R., Herbst, B., Askan, G., Bhanot, U., Senbabaoğlu, Y., et al.; Australian Pancreatic Cancer Genome Initiative; Garvan Institute of Medical Research; Prince of Wales Hospital; Royal North Shore Hospital; University of Glasgow; St Vincent’s Hospital; QIMR Berghofer Medical Research Institute; University of Melbourne, Centre for Cancer Research; University of Queensland, Institute for Molecular Bioscience; Bankstown Hospital; Liverpool Hospital; Royal Prince Alfred Hospital, Chris O’Brien Lifehouse; Westmead Hospital; Fremantle Hospital; St John of God Healthcare; Royal Adelaide Hospital; Flinders Medical Centre; Envoi Pathology; Princess Alexandria Hospital; Austin Hospital; Johns Hopkins Medical Institutes; ARC-Net Centre for Applied Research on Cancer (2017). Identification of unique neoantigen qualities in long-term survivors of pancreatic cancer. *Nature* *551*, 512–516.
- Bjerregaard, A.-M., Nielsen, M., Jurtz, V., Barra, C.M., Hadrup, S.R., Szallasi, Z., and Eklund, A.C. (2017). An analysis of natural T cell responses to predicted tumor neoepitopes. *Front. Immunol.* *8*, 1566.
- Richman, L.P., Vonderheide, R.H., and Rech, A.J. (2019). Neoantigen dissimilarity to the self-proteome predicts immunogenicity and response to immune checkpoint blockade. *Cell Syst.* *9*, 375–382.e4.
- Devlin, J.R., Alonso, J.A., Ayres, C.M., Keller, G.L.J., Bobisse, S., Vander Kooi, C.W., Coukos, G., Gfeller, D., Harari, A., and Baker, B.M. (2020). Structural dissimilarity from self drives neoepitope escape from immune tolerance. *Nat. Chem. Biol.* *16*, 1269–1276.
- Chowell, D., Krishna, S., Becker, P.D., Cocita, C., Shu, J., Tan, X., Greenberg, P.D., Klavinskis, L.S., Blattman, J.N., and Anderson, K.S. (2015). TCR contact residue hydrophobicity is a hallmark of immunogenic CD8<sup>+</sup> T cell epitopes. *Proc. Natl. Acad. Sci. USA* *112*, E1754–E1762.
- Calis, J.J.A., Maybeno, M., Greenbaum, J.A., Weiskopf, D., De Silva, A.D., Sette, A., Keşmir, C., and Peters, B. (2013). Properties of MHC class I presented peptides that enhance immunogenicity. *PLoS Comput. Biol.* *9*, e1003266.
- Sahin, U., Oehm, P., Derhovanessian, E., Jabulowsky, R.A., Vormehr, M., Gold, M., Maurus, D., Schwarck-Kokarakis, D., Kuhn, A.N., Omokoko, T., et al. (2020). An RNA vaccine drives immunity in checkpoint-inhibitor-treated melanoma. *Nature* *585*, 107–112.

31. Dunn, G.P., Old, L.J., and Schreiber, R.D. (2004). The three Es of cancer immunoediting. *Annu. Rev. Immunol.* *22*, 329–360.
32. Marty, R., Kaabinejadian, S., Rossell, D., Slifker, M.J., van de Haar, J., Engin, H.B., de Prisco, N., Ideker, T., Hildebrand, W.H., Font-Burgada, J., and Carter, H. (2017). MHC-I genotype restricts the oncogenic mutational landscape. *Cell* *171*, 1272–1283.e15.
33. Van den Eynden, J., Jiménez-Sánchez, A., Miller, M.L., and Larsson, E. (2019). Lack of detectable neoantigen depletion signals in the untreated cancer genome. *Nat. Genet.* *51*, 1741–1748.
34. Bassani-Sternberg, M., Chong, C., Guillaume, P., Solleder, M., Pak, H., Gannon, P.O., Kandalaf, L.E., Coukos, G., and Gfeller, D. (2017). Deciphering HLA-I motifs across HLA peptidomes improves neo-antigen predictions and identifies allosteric regulating HLA specificity. *PLoS Comput. Biol.* *13*, e1005725.
35. Bulik-Sullivan, B., Busby, J., Palmer, C.D., Davis, M.J., Murphy, T., Clark, A., Busby, M., Duke, F., Yang, A., Young, L., et al. (2018). Deep learning using tumor HLA peptide mass spectrometry datasets improves neoantigen identification. *Nat. Biotechnol.* *37*, 55–63.
36. Bassani-Sternberg, M., Bräunlein, E., Klar, R., Engleitner, T., Sinitcyn, P., Audehm, S., Straub, M., Weber, J., Slotta-Huspenina, J., Specht, K., et al. (2016). Direct identification of clinically relevant neoepitopes presented on native human melanoma tissue by mass spectrometry. *Nat. Commun.* *7*, 13404.
37. Bentzen, A.K., Marquard, A.M., Lyngaa, R., Saini, S.K., Ramskov, S., Donia, M., Such, L., Furness, A.J.S., McGranahan, N., Rosenthal, R., et al. (2016). Large-scale detection of antigen-specific T cells using peptide-MHC-I multimers labeled with DNA barcodes. *Nat. Biotechnol.* *34*, 1037–1045.
38. Cohen, C.J., Gartner, J.J., Horovitz-Fried, M., Shamalov, K., Trebska-McGowan, K., Bliskovsky, V.V., Parkhurst, M.R., Ankr, C., Prickett, T.D., Crystal, J.S., et al. (2015). Isolation of neoantigen-specific T cells from tumor and peripheral lymphocytes. *J. Clin. Invest.* *125*, 3981–3991.
39. Strønen, E., Toebes, M., Kelderman, S., van Buuren, M.M., Yang, W., van Rooij, N., Donia, M., Bösch, M.-L., Lund-Johansen, F., Olweus, J., and Schumacher, T.N. (2016). Targeting of cancer neoantigens with donor-derived T cell receptor repertoires. *Science* *352*, 1337–1341.
40. Kalaora, S., Barnea, E., Merhavi-Shoham, E., Qutob, N., Teer, J.K., Shimony, N., Schachter, J., Rosenberg, S.A., Besser, M.J., Admon, A., and Samuels, Y. (2016). Use of HLA peptidomics and whole exome sequencing to identify human immunogenic neo-antigens. *Oncotarget* *7*, 5110–5117.
41. van Rooij, N., van Buuren, M.M., Philips, D., Velds, A., Toebes, M., Heemskerck, B., van Dijk, L.J.A., Behjati, S., Hilkmann, H., El Atmioui, D., et al. (2013). Tumor exome analysis reveals neoantigen-specific T-cell reactivity in an ipilimumab-responsive melanoma. *J. Clin. Oncol.* *31*, e439–e442.
42. Rajasagi, M., Shukla, S.A., Fritsch, E.F., Keskin, D.B., DeLuca, D., Carmona, E., Zhang, W., Sougnez, C., Cibulskis, K., Sidney, J., et al. (2014). Systematic identification of personal tumor-specific neoantigens in chronic lymphocytic leukemia. *Blood* *124*, 453–462.
43. Rizvi, N.A., Hellmann, M.D., Snyder, A., Kvistborg, P., Makarov, V., Havel, J.J., Lee, W., Yuan, J., Wong, P., Ho, T.S., et al. (2015). Cancer immunology. Mutational landscape determines sensitivity to PD-1 blockade in non-small cell lung cancer. *Science* *348*, 124–128.
44. Snyder, A., Makarov, V., Merghoub, T., Yuan, J., Zaretsky, J.M., Desrichard, A., Walsh, L.A., Postow, M.A., Wong, P., Ho, T.S., et al. (2014). Genetic basis for clinical response to CTLA-4 blockade in melanoma. *N. Engl. J. Med.* *371*, 2189–2199.
45. Wick, D.A., Webb, J.R., Nielsen, J.S., Martin, S.D., Kroeger, D.R., Milne, K., Castellarin, M., Twumasi-Boateng, K., Watson, P.H., Holt, R.A., and Nelson, B.H. (2014). Surveillance of the tumor mutanome by T cells during progression from primary to recurrent ovarian cancer. *Clin. Cancer Res.* *20*, 1125–1134.
46. Weiskopf, D., Yauch, L.E., Angelo, M.A., John, D.V., Greenbaum, J.A., Sidney, J., Kolla, R.V., De Silva, A.D., de Silva, A.M., Grey, H., et al. (2011). Insights into HLA-restricted T cell responses in a novel mouse model of dengue virus infection point toward new implications for vaccine design. *J. Immunol.* *187*, 4268–4279.
47. Nielsen, M., Lundegaard, C., Lund, O., and Keşmir, C. (2005). The role of the proteasome in generating cytotoxic T-cell epitopes: insights obtained from improved predictions of proteasomal cleavage. *Immunogenetics* *57*, 33–41.
48. Peters, B., Bulik, S., Tampe, R., Van Endert, P.M., and Holzhütter, H.-G. (2003). Identifying MHC class I epitopes by predicting the TAP transport efficiency of epitope precursors. *J. Immunol.* *171*, 1741–1749.
49. Allard, M., Couturaud, B., Carretero-Iglesia, L., Duong, M.N., Schmidt, J., Monnot, G.C., Romero, P., Speiser, D.E., Hebeisen, M., and Rufer, N. (2017). TCR-ligand dissociation rate is a robust and stable biomarker of CD8+ T cell potency. *JCI Insight* *2*, e92570.
50. Hebeisen, M., Allard, M., Gannon, P.O., Schmidt, J., Speiser, D.E., and Rufer, N. (2015). Identifying individual T cell receptors of optimal avidity for tumor antigens. *Front. Immunol.* *6*, 582.
51. Schmidt, J., Guillaume, P., Irving, M., Baumgaertner, P., Speiser, D., and Luescher, I.F. (2011). Reversible major histocompatibility complex I-peptide multimers containing Ni(2+)-nitrilotriacetic acid peptides and histidine tags improve analysis and sorting of CD8(+) T cells. *J. Biol. Chem.* *286*, 41723–41735.
52. Tangri, S., Ishioka, G.Y., Huang, X., Sidney, J., Southwood, S., Fikes, J., and Sette, A. (2001). Structural features of peptide analogs of human histocompatibility leukocyte antigen class I epitopes that are more potent and immunogenic than wild-type peptide. *J. Exp. Med.* *194*, 833–846.
53. Yu, Z., Theoret, M.R., Touloukian, C.E., Surman, D.R., Garman, S.C., Feigenbaum, L., Baxter, T.K., Baker, B.M., and Restifo, N.P. (2004). Poor immunogenicity of a self/tumor antigen derives from peptide-MHC-I instability and is independent of tolerance. *J. Clin. Invest.* *114*, 551–559.
54. Eby, J.M., Smith, A.R., Riley, T.P., Cosgrove, C., Ankney, C.M., Henning, S.W., Paulos, C.M., Garrett-Mayer, E., Luiten, R.M., Nishimura, M.I., et al. (2019). Molecular properties of gp100-reactive T-cell receptors drive the cytokine profile and antitumor efficacy of transgenic host T cells. *Pigment Cell Melanoma Res.* *32*, 68–78.
55. Zaretsky, J.M., Garcia-Diaz, A., Shin, D.S., Escuin-Ordinas, H., Hugo, W., Hu-Lieskovan, S., Torrejon, D.Y., Abril-Rodriguez, G., Sandoval, S., Barthly, L., et al. (2016). Mutations associated with acquired resistance to PD-1 blockade in melanoma. *N. Engl. J. Med.* *375*, 819–829.
56. DuPage, M., Mazumdar, C., Schmidt, L.M., Cheung, A.F., and Jacks, T. (2012). Expression of tumour-specific antigens underlies cancer immunoediting. *Nature* *482*, 405–409.
57. Rooney, M.S., Shukla, S.A., Wu, C.J., Getz, G., and Hacohen, N. (2015). Molecular and genetic properties of tumors associated with local immune cytolytic activity. *Cell* *160*, 48–61.
58. Angelova, M., Mlecnik, B., Vasaturo, A., Bindea, G., Fredriksen, T., Lafontaine, L., Buttard, B., Morgand, E., Bruni, D., Jouret-Mourin, A., et al. (2018). Evolution of metastases in space and time under immune selection. *Cell* *175*, 751–765.e16.
59. Singh, N.K., Riley, T.P., Baker, S.C.B., Borrmann, T., Weng, Z., and Baker, B.M. (2017). Emerging concepts in TCR specificity: rationalizing and (maybe) predicting outcomes. *J. Immunol.* *199*, 2203–2213.
60. Perdivara, I., Deterding, L.J., Przybylski, M., and Tomer, K.B. (2010). Mass spectrometric identification of oxidative modifications of tryptophan residues in proteins: chemical artifact or post-translational modification? *J. Am. Soc. Mass Spectrom.* *21*, 1114–1117.
61. Castro, A., Ozturk, K., Pyke, R.M., Xian, S., Zanetti, M., and Carter, H. (2019). Elevated neoantigen levels in tumors with somatic mutations in the HLA-A, HLA-B, HLA-C and B2M genes. *BMC Med. Genomics* *12* (Suppl 6), 107.



62. Yang, F., Kim, D.-K., Nakagawa, H., Hayashi, S., Imoto, S., Stein, L., and Roth, F.P. (2019). Quantifying immune-based counterselection of somatic mutations. *PLoS Genet.* *15*, e1008227.
63. Zapata, L., Pich, O., Serrano, L., Kondrashov, F.A., Ossowski, S., and Schaefer, M.H. (2018). Negative selection in tumor genome evolution acts on essential cellular functions and the immunopeptidome. *Genome Biol.* *19*, 67.
64. Alexandrov, L.B., Kim, J., Haradhvala, N.J., Huang, M.N., Tian Ng, A.W., Wu, Y., Boot, A., Covington, K.R., Gordenin, D.A., Bergstrom, E.N., et al.; PCAWG Mutational Signatures Working Group; PCAWG Consortium (2020). The repertoire of mutational signatures in human cancer. *Nature* *578*, 94–101.
65. Tran, E., Ahmadzadeh, M., Lu, Y.-C., Gros, A., Turcotte, S., Robbins, P.F., Gartner, J.J., Zheng, Z., Li, Y.F., Ray, S., et al. (2015). Immunogenicity of somatic mutations in human gastrointestinal cancers. *Science* *350*, 1387–1390.
66. Pajot, A., Michel, M.-L., Fazilleau, N., Pancré, V., Auriault, C., Ojcius, D.M., Lemonnier, F.A., and Lone, Y.-C. (2004). A mouse model of human adaptive immune functions: HLA-A2.1-/HLA-DR1-transgenic H-2 class I/class II-knockout mice. *Eur. J. Immunol.* *34*, 3060–3069.
67. Hebeisen, M., Schmidt, J., Guillaume, P., Baumgaertner, P., Speiser, D.E., Luescher, I., and Rufer, N. (2015). Identification of rare high-avidity, tumor-reactive CD8+ T cells by monomeric TCR-ligand off-rates measurements on living cells. *Cancer Res.* *75*, 1983–1991.
68. Boucherma, R., Kridane-Miledi, H., Bouziat, R., Rasmussen, M., Gatard, T., Langa-Vives, F., Lemerrier, B., Lim, A., Bérard, M., Benmohamed, L., et al. (2013). HLA-A\*01:03, HLA-A\*24:02, HLA-B\*08:01, HLA-B\*27:05, HLA-B\*35:01, HLA-B\*44:02, and HLA-C\*07:01 monochain transgenic/H-2 class I null mice: novel versatile preclinical models of human T cell responses. *J. Immunol.* *191*, 583–593.
69. Davis-Harrison, R.L., Armstrong, K.M., and Baker, B.M. (2005). Two different T cell receptors use different thermodynamic strategies to recognize the same peptide/MHC ligand. *J. Mol. Biol.* *346*, 533–550.
70. Otwinowski, Z., and Minor, W. (1997). Processing of X-ray diffraction data collected in oscillation mode. *Methods Enzymol.* *276*, 307–326.
71. Collaborative Computational Project, Number 4 (1994). The CCP4 suite: programs for protein crystallography. *Acta Crystallogr. D Biol. Crystallogr.* *50*, 760–763.
72. Terwilliger, T.C., Grosse-Kunstleve, R.W., Afonine, P.V., Moriarty, N.W., Zwart, P.H., Hung, L.W., Read, R.J., and Adams, P.D. (2008). Iterative model building, structure refinement and density modification with the PHENIX AutoBuild wizard. *Acta Crystallogr. D Biol. Crystallogr.* *64*, 61–69.
73. Afonine, P.V., Grosse-Kunstleve, R.W., Echols, N., Headd, J.J., Moriarty, N.W., Mustyakimov, M., Terwilliger, T.C., Urzhumtsev, A., Zwart, P.H., and Adams, P.D. (2012). Towards automated crystallographic structure refinement with phenix.refine. *Acta Crystallogr. D Biol. Crystallogr.* *68*, 352–367.
74. Emsley, P., Lohkamp, B., Scott, W.G., and Cowtan, K. (2010). Features and development of Coot. *Acta Crystallogr. D Biol. Crystallogr.* *66*, 486–501.
75. Chen, V.B., Arendall, W.B., 3rd, Headd, J.J., Keedy, D.A., Immormino, R.M., Kapral, G.J., Murray, L.W., Richardson, J.S., and Richardson, D.C. (2010). MolProbity: all-atom structure validation for macromolecular crystallography. *Acta Crystallogr. D Biol. Crystallogr.* *66*, 12–21.
76. Blevins, S.J., and Baker, B.M. (2017). Using global analysis to extend the accuracy and precision of binding measurements with T cell receptors and their peptide/MHC ligands. *Front. Mol. Biosci.* *4*, 2.
77. Hellman, L.M., Yin, L., Wang, Y., Blevins, S.J., Riley, T.P., Belden, O.S., Spear, T.T., Nishimura, M.I., Stern, L.J., and Baker, B.M. (2016). Differential scanning fluorimetry based assessments of the thermal and kinetic stability of peptide-MHC complexes. *J. Immunol. Methods* *432*, 95–101.
78. Charoentong, P., Finotello, F., Angelova, M., Mayer, C., Efremova, M., Rieder, D., Hackl, H., and Trajanoski, Z. (2017). Pan-cancer immunogenomic analyses reveal genotype-immunophenotype relationships and predictors of response to checkpoint blockade. *Cell Rep.* *18*, 248–262.
79. Aran, D., Sirota, M., and Butte, A.J. (2015). Systematic pan-cancer analysis of tumour purity. *Nat. Commun.* *6*, 8971.
80. Racle, J., de Jonge, K., Baumgaertner, P., Speiser, D.E., and Gfeller, D. (2017). Simultaneous enumeration of cancer and immune cell types from bulk tumor gene expression data. *eLife* *6*, 1865.

STAR★METHODS

KEY RESOURCES TABLE

| REAGENT or RESOURCE                                                                                                        | SOURCE                                                                                                                                         | IDENTIFIER                                                                                                             |
|----------------------------------------------------------------------------------------------------------------------------|------------------------------------------------------------------------------------------------------------------------------------------------|------------------------------------------------------------------------------------------------------------------------|
| <b>Antibodies</b>                                                                                                          |                                                                                                                                                |                                                                                                                        |
| Anti-hCD8                                                                                                                  | Biologend                                                                                                                                      | 313904                                                                                                                 |
| Anti-CCR7                                                                                                                  | Biologend                                                                                                                                      | 353226                                                                                                                 |
| Anti-CD45RA                                                                                                                | Beckman Coulter                                                                                                                                | IM2711U                                                                                                                |
| <b>Biological samples</b>                                                                                                  |                                                                                                                                                |                                                                                                                        |
| Healthy donors blood mononuclear cells and blood mononuclear cells and tumor infiltrating lymphocytes from cancer patients | Biobank from the Center of Experimental Therapeutics, Department of Oncology, Centre Hospitalier Universitaire Vaudois, Lausanne, Switzerland. | Protocol 235/14 and 2016-02094, 2016-02166 and 2017-00490                                                              |
| <b>Chemicals, peptides, and recombinant proteins</b>                                                                       |                                                                                                                                                |                                                                                                                        |
| CMV variant peptides                                                                                                       | Peptide & Tetramer Core Facility, University of Lausanne                                                                                       | N/A                                                                                                                    |
| HIV variant peptides                                                                                                       | Peptide & Tetramer Core Facility, University of Lausanne                                                                                       | N/A                                                                                                                    |
| Other peptides                                                                                                             | Peptide & Tetramer Core Facility, University of Lausanne                                                                                       | N/A                                                                                                                    |
| pMHC NTAmers                                                                                                               | Peptide & Tetramer Core Facility, University of Lausanne                                                                                       | N/A                                                                                                                    |
| RPMI                                                                                                                       | GIBCO                                                                                                                                          | 61870-010                                                                                                              |
| MEM NEAA                                                                                                                   | GIBCO                                                                                                                                          | 11140-035                                                                                                              |
| 2-Mercaptoethanol                                                                                                          | GIBCO                                                                                                                                          | 31350-010                                                                                                              |
| Sodium Pyruvat                                                                                                             | GIBCO                                                                                                                                          | 11360-033                                                                                                              |
| HEPES                                                                                                                      | Bio Concept                                                                                                                                    | 5-31F00H                                                                                                               |
| Pen/strep                                                                                                                  | Bio Concept                                                                                                                                    | 4-01F00H                                                                                                               |
| Human Serum                                                                                                                | Biowest                                                                                                                                        | S419H-100                                                                                                              |
| FBS                                                                                                                        | Biowest                                                                                                                                        | S-1810-500                                                                                                             |
| IL2                                                                                                                        | Novartis                                                                                                                                       | Proleukina, PZN02238131                                                                                                |
| DAPI                                                                                                                       | Sigma-Aldrich                                                                                                                                  | 10236276001                                                                                                            |
| Incomplete Freund Adjuvant                                                                                                 | Sigma-Aldrich                                                                                                                                  | F5506-10ML                                                                                                             |
| ODN1826                                                                                                                    | Invivogen                                                                                                                                      | Tlrl-1826-5                                                                                                            |
| <b>Critical commercial assays</b>                                                                                          |                                                                                                                                                |                                                                                                                        |
| Human-Interferon $\gamma$ release assay                                                                                    | Mabtech                                                                                                                                        | 3420-2APT-10                                                                                                           |
| Human-CD8 isolation kit                                                                                                    | Milteny                                                                                                                                        | 130-045-201                                                                                                            |
| Murine-Interferon $\gamma$ release assay                                                                                   | Mabtech                                                                                                                                        | 3321-4APT-10                                                                                                           |
| <b>Experimental models: cell lines</b>                                                                                     |                                                                                                                                                |                                                                                                                        |
| T2 cells                                                                                                                   | ATCC                                                                                                                                           | CRL-1992                                                                                                               |
| CD4 blasts cells                                                                                                           | In house                                                                                                                                       | N/A                                                                                                                    |
| <b>Experimental models: organisms/strains</b>                                                                              |                                                                                                                                                |                                                                                                                        |
| HLA-A2.1/DR1 mice                                                                                                          | Pajot et al. <sup>66</sup>                                                                                                                     | N/A                                                                                                                    |
| <b>Software and algorithms</b>                                                                                             |                                                                                                                                                |                                                                                                                        |
| NetMHCpan4.1                                                                                                               | Reynisson et al. <sup>15</sup>                                                                                                                 | <a href="http://www.cbs.dtu.dk/services/NetMHCpan/">http://www.cbs.dtu.dk/services/NetMHCpan/</a>                      |
| MHCflurry1.6.1                                                                                                             | O'Donnell et al. <sup>13</sup>                                                                                                                 | <a href="https://github.com/openvax/mhcfllurry">https://github.com/openvax/mhcfllurry</a>                              |
| HLAthena                                                                                                                   | Sarkizova et al., 2019 <sup>16</sup>                                                                                                           | <a href="http://hlathena.tools/">http://hlathena.tools/</a> (executable shared by the authors, private communications) |

(Continued on next page)



**Continued**

| REAGENT or RESOURCE           | SOURCE                                                              | IDENTIFIER                                                                                                |
|-------------------------------|---------------------------------------------------------------------|-----------------------------------------------------------------------------------------------------------|
| NetChop3.0                    | Nielsen et al. <sup>47</sup> ; Stranzl and Lundegaard <sup>21</sup> | <a href="http://www.cbs.dtu.dk/services/NetCTLpan/">http://www.cbs.dtu.dk/services/NetCTLpan/</a>         |
| TAP                           | Peters et al. <sup>48</sup> ; Stranzl and Lundegaard <sup>21</sup>  | <a href="http://www.cbs.dtu.dk/services/NetCTLpan/">http://www.cbs.dtu.dk/services/NetCTLpan/</a>         |
| IEBD immunogenicity predictor | Calis et al. <sup>29</sup>                                          | <a href="http://tools.iedb.org/immunogenicity/">http://tools.iedb.org/immunogenicity/</a>                 |
| NetMHCstabpan1.0              | Rasmussen et al. <sup>14</sup>                                      | <a href="http://www.cbs.dtu.dk/services/NetMHCstabpan/">http://www.cbs.dtu.dk/services/NetMHCstabpan/</a> |
| MixMHCpred2.1                 | Gfeller et al. <sup>12</sup>                                        | <a href="https://github.com/GfellerLab/MixMHCpred">https://github.com/GfellerLab/MixMHCpred</a>           |
| Prism version 8.0.0           | GraphPad Software, Inc                                              | N/A                                                                                                       |
| FlowJo 9.6.4                  | FlowJo, LLC                                                         | N/A                                                                                                       |
| <b>Other</b>                  |                                                                     |                                                                                                           |
| Chromium-51 radionuclide      | Perkin Elmer                                                        | NEZ030S002MC                                                                                              |

**RESOURCE AVAILABILITY**

**Lead contact**

Further information and requests for resources and reagents should be directed to and will be fulfilled by the Lead contact, Dr. David Gfeller ([David.gfeller@unil.ch](mailto:David.gfeller@unil.ch)).

**Materials availability**

All unique materials and reagents generated in this study are available from the Lead Contact with a completed material transfer agreement.

**Data and code availability**

PRIME is freely available for academic researchers at the web interface <http://prime.gfellerlab.org> and as command-line tool <https://github.com/GfellerLab/PRIME>. All data used to train and validate PRIME are available in Supplementary Materials (Tables S1 and S4). The accession number for the X-ray structure reported in this paper is PDB: 6VM8.

**EXPERIMENTAL MODEL AND SUBJECT DETAILS**

**Animal experiments**

HLA-A2/DR1 mice (C57BL/6-Tg(HLA-A2.1)/Tg(HLA-DR1)/H-2class-I/class-II-knockout)<sup>66</sup> were born and maintained in a conventional animal facility at the University of Lausanne, Switzerland. Experiments were conducted in accordance with the Cantonal Veterinary Office (License VD3321). Female and male of 6 to 10 weeks were randomly used for experiments.

**Patients, Healthy donors and ethic statement**

Peripheral blood samples were collected from HLA-A\*0201-positive healthy donors. Patients under study had stage III/IV metastatic melanoma, ovarian, non-small cell lung cancer and colorectal cancer and had received several lines of chemotherapy. Patients were enrolled under protocols approved by the respective institutional regulatory committees at the University of Pennsylvania, USA, and Lausanne University Hospital (CHUV), Switzerland (NCT00112242; <https://www.clinicaltrials.gov>). Patients and healthy donors' recruitment, study procedures and blood withdrawal were approved by regulatory authorities and all signed written informed consents.

**Cell lines and primary cells**

HLA-A\*0201-positive TAP-deficient T2 cells (ATCC) and CD4 blasts were cultured in RPMI 1640 Glutamax media (GIBCO) supplemented with 10% FBS (Biowest) and penicillin/streptomycin (BioConcept). Primary CD8+ T cells were cultured in RPMI 1640 Glutamax media (GIBCO) supplemented with 8% Humns serum (Biowest), non-essential amino acids (GIBCO), 2-mercaptoethanol (GIBCO), sodium pyruvate (GIBCO), HEPES (GIBCO), penicillin/streptomycin (BioConcept) and 150 U/ml of rhIL2 (Novartis). All cells were maintained at 37°C under 5% CO<sub>2</sub> atmosphere.

**METHOD DETAILS**

**Collection of immunogenic and non-immunogenic peptides used for training PRIME**

Immunogenic (n = 1,282) and non-immunogenic (n = 3,676) peptides were collected from many recent studies, and comprise both pathogen and cancer testis antigens as well as cancer neo-epitopes (Table S1 and Figure 1A). In these studies, immunogenicity was assessed using different T cell assays, such as INF $\gamma$  ELISpot or pHLA tetramer staining. Only peptides with reported HLA-I restriction

were considered. Non-immunogenic peptides were defined as peptides for which CD8+ T cell reactivity could not be observed in the experiments where they had been tested.

### Existing epitope predictors used for benchmark

Benchmarking of the predictions was performed with several predictors. First, we used predictors of binding to HLA-I molecules and antigen presentation: MixMHCpred2.1<sup>12</sup>; NetMHCpan4.1 considering both eluted ligand predictions (NetMHCpanEL) or binding affinity predictions (NetMHCpanBA)<sup>15</sup>; MHCflurry1.6.1<sup>13</sup>; and HLAthena<sup>16</sup>. Percentile rank values (%rank) were used for all these predictors and are displayed as  $-\log(\%rank)$  in Figures. Cleavage predictions based on NetChop-3.0<sup>47</sup> and TAP transport efficiency<sup>48</sup> were retrieved from the NetCTLpan website<sup>21</sup>, using the flanking regions consisting of the ten N- and ten C-terminal residues, when possible.

Next, we considered predictors that aim to capture signals related to immunogenicity beyond binding to HLA-I. The immunogenicity predictions with the method of Calis et al.<sup>29</sup> were retrieved from the IEDB website (<http://tools.iedb.org/immunogenicity/>) and were referred to as “IEDB.imm” in the Figures. As %rank are more comparable between HLA-I alleles and recommended by several tools, the ratio of affinity between the mutated and the wt peptides (referred to as “Ratio”) was computed as  $\log(\%rank_{wt}) - \log(\%rank_{mutant})$ , based on NetMHCpanEL %rank predictions. The dissimilarity-to-self (“DisToSelf”) was defined by computing the distance with all peptides of the same length in the human proteome based on the BLOSUM62 substitution matrix, and using the lowest

value as the DisToSelf. Mathematically, for two peptides  $x = (x_1, \dots, x_L)$  and  $y = (y_1, \dots, y_L)$ , the distance was computed as  $\sum_{i=1}^L (b_{y_i, x_i} - b_{x_i, y_i})$ , where  $b_{a,b}$  stands for the BLOSUM62 entry for amino acids  $a$  and  $b$ . The method of Wells et al.<sup>8</sup>, referred to as TESLA in this manuscript, was implemented based on the proposed thresholds: predicted affinity < 34nM AND predicted stability > 1.4h AND (ratio\_Kd < 0.1 OR Foreignness >  $10^{-16}$ ). Affinity was predicted with NetMHCpan4.1 (Aff(nM)), stability was predicted with NetMHCstabpan1.0 (Thalf(h)), ratio\_Kd was computed as the ratio between the predicted affinity (Aff(nM)) of the mutated and the wt peptide, foreignness was computed with the antigen.garnish package (<https://github.com/andrewrech/antigen.garnish>)<sup>26</sup>, as done in TESLA. Expression values could not be considered since they were not determined for the peptides analyzed in this study. The Ratio and the TESLA predictions were only computed for mutated peptides found in cancer, since they are not defined for pathogens or cancer testis antigens. The EDGE method<sup>35</sup> and the method of Chowell et al.<sup>28</sup> could not be included in this benchmark, as neither an executable nor a web interface is available.

### Training of the immunogenicity predictor PRIME

To disentangle the influence of affinity to HLA-I molecules from other parameters, we first annotated positions with minimal impact on HLA-I affinity (MIA positions) and potentially interacting with the TCR for each HLA-I allele, using our set of HLA-I binding motifs derived from unbiased MS data. To this end, the information content (i.e.,  $1 + \sum_{i=1}^{20} p_{ij} \log_{20}(p_{ij})$ , where  $p_{ij}$  represents the frequency of amino acid  $i$  at position  $j$  in 9-mer ligands for a given allele) was computed for each position  $j = 4, \dots, 8$  and for each allele based on 9-mer ligands. Positions with information content lower than a threshold of 0.3 were defined as MIA positions. Position 4 in HLA-A\*02 alleles, position 5 in HLA-A\*68:02, position 6 in HLA-A\*25:02 and HLA-A\*26:01 and position 7 in HLA-A\*29:02 were further removed from the list, as they show residual specificity. This led to 6 different groups of alleles ( $g = 1, \dots, 6$ ) with specific MIA positions corresponding to:  $g = 1$ : P4 to P8 (e.g., HLA-A\*01:01);  $g = 2$ : P5 to P8 (e.g., HLA-A\*02:01);  $g = 3$ : P5, P7 and P8 (e.g., HLA-A\*02:03);  $g = 4$ : P4, P5, P7 and P8 (e.g., HLA-A\*25:01);  $g = 5$ : P4 to P6 and P8 (e.g., HLA-A\*29:02);  $g = 6$ : P4 and P6 to P8 (e.g., HLA-B\*08:01) (Table S2). For peptides of length other than 9, the MIA positions were defined for each group as follows:  $g = 1$ : P4 to P $\Omega-1$ ;  $g = 2$ : P5 to P $\Omega-1$ ;  $g = 3$ : P5 to P $\Omega-4$  and P $\Omega-2$  to P $\Omega-1$ ;  $g = 4$ : P4, P5 and P7 to P $\Omega-1$ ;  $g = 5$ : P4 to P $\Omega-3$  and P $\Omega-1$ ;  $g = 6$ : P4 and P6 to P $\Omega-1$ , where  $\Omega$  stands for the length of the peptide.

We next trained a logistic regression (glmnet R package v2.0.16 (alpha = 0 and lambda = 1)) encoding each pHLA pair as a 21-dimensional vector consisting of the predicted affinity ( $-\log(\%rank)$ ) of the peptide to the HLA-I molecule and the frequencies of the 20 amino acids at MIA positions<sup>29</sup>. Binding predictions were performed with MixMHCpred2.1. 2,800 (i.e., 50 peptides for 56 common HLA-I alleles used in our training set) additional 9-mer peptides randomly selected from the human proteome were added to the training set as negatives (i.e., non-immunogenic) to better match the real situation where non-immunogenic peptides are in excess compared to immunogenic ones. Peptides with low predicted binding to HLA-I (MixMHCpred %rank > T, with T = 5% in this work) were always predicted as non-immunogenic (i.e., given a score of 0 in the PRIME logistic regression). The same threshold was applied to the other tools used in all validation based on the predicted affinity (%rank) for each HLA-I affinity predictor and based on MixMHCpred %rank for the other tools (NetChop, TAP, IEDB.imm, Ratio, DisToSelf and TESLA) (i.e., giving a score of 1 minus the score of the peptide with the lowest score to compute the AUC). Logistic regressions were used when combining different predictors (i.e., NetChop, TAP, IEDB.imm or DisToSelf with MixMHCpred or PRIME, Figures S2C and S2D). Randomizing amino acids at MIA positions was performed by replacing the residues at these positions in each peptide with randomly selected residues from the human proteome.

In the upper panel of Figure S4B, amino acid frequencies at MIA positions were computed for all neo-epitopes and renormalized by those in human proteins, considering residues between the fifth and the second to last positions (this is to avoid including in those background frequencies residue that cannot be found at MIA positions by constructions, especially the starting Met). In the lower

panel of Figure S4B, all neo-epitopes with at least one non-immunogenic cancer mutant peptide from the same allele, of the same length and with the same predicted affinity (based on 10 equal bins between the lowest and highest value of MixMHCpred log(% rank)) were considered to compute amino acid frequencies at MIA positions (115 out of 129 neo-epitopes). For renormalization, amino acid frequencies at MIA positions in non-immunogenic cancer mutated peptides were computed after weighting each of these peptides in order to have exactly the same distribution of alleles, peptide lengths and binding affinities as in the 115 neo-epitopes.

For each allele, percentile ranks (%rank) for PRIME were computed based on a dataset of 700,000 8- to 14-mer peptides (100,000 for each length) randomly selected from the human proteome, similarly to what is done for HLA-I ligand predictors such as MixMHCpred or NetMHCpan.

### Cross-validation

Validation on neo-epitopes was first carried out with ten-fold cross-validation. To this end, the set of cancer mutated peptides was split into ten groups, and each group was iteratively used as testing set (Figure S2A). Similarly the other peptides (i.e., pathogens/cancer testis antigens + random negatives) were also split in ten groups and nine of them were iteratively used to train the algorithm. To ensure that our results are not biased by one specific study, we also used a leave-one-study-out cross-validation strategy (Figure S2A). Each neo-epitope study with at least five immunogenic and five non-immunogenic peptides (seven studies in total) were iteratively removed from the training of the predictor and used as testing set. The remaining peptides used only for training were also split into seven groups, and 6 of them were iteratively used for training (Figure S2A). Finally, we performed a leave-one-allele-out cross-validation over the set of HLA-I alleles with at least five immunogenic and five non-immunogenic peptides in the testing set. To avoid biases due to the similarity between HLA-I alleles, peptides tested with alleles from the same super-type than the HLA-I allele used in the testing set were excluded from the training (Figure S2A). The area under the receiver operating curve (AUC) and the area under the Precision Recall curve (PRAUC) were used to assess the prediction accuracy.

### Epitopes used for external validations

Data from Capietto et al.<sup>23</sup> were retrieved from the original publication. For these epitopes, NetMHCpanBA4.1 was used to predict % rank used in PRIME, since MixMHCpred cannot run on mouse MHC alleles. Only peptides experimentally validated for immunogenicity were used in the benchmarking of Figure 1F (26 positives in total). Data from Tangri et al.<sup>52</sup> for the analogs of the two epitopes (IMIGVLVGV from CEA and KVAELVHFL from MAGEA3) were manually retrieved from the Figures published in this study (Table S4D) and the ranking of the peptide analogs was used to compute Spearman correlation coefficients in Figure S4I. Only mutations at P5 were considered, since this position is the one with the lowest impact on affinity to HLA-A\*02:01 (Figures S4F and S4G).

### Computational efficiency

In Figure 2, peptides of length 8 to 13 were used for PRIME, NetMHCpan and MHCflurry, and peptides of length 8 to 11 for HLATHENA, since longer peptides are not supported. Predictions were performed with six common HLA-I alleles (HLA-A\*02:01, HLA-A\*03:01, HLA-B\*07:02, HLA-B\*08:01, HLA-C\*04:01, HLA-C\*07:02), on a single core (MacBookPro, 2.9 GHz Intel Core i7).

### Measurements of structural avidity (half-lives) and cytolytic activity (EC<sub>50</sub>) of antigen-specific CD8+ T cells

CD8+ T cells directed against shared viral, tumor associated antigens and cancer neo-epitope of Figure 3 were isolated from patients as previously described<sup>5</sup>. Written informed consents were obtained from all patients and HDs. NTAmers were produced by the Peptide and Tetramer Core Facility of the University of Lausanne. NTAmers are dually labeled pHLA multimers built on NTA-Ni<sup>2+</sup>-His-tag interactions and were used for monomeric pHLA-TCR dissociation kinetics measurements as previously described<sup>51,67</sup>. Briefly, antigen-specific CD8+ T cells were stained for 45 min at 4°C in PBS, 0.2% BSA, 5 mM EDTA with cognate NTAmers. NTAmers staining was assessed at 4°C on a SORP-LSR II flow cytometer (BD Biosciences). Following 30 s of baseline acquisition, imidazole (100 mM) was added and Cy5 fluorescence was measured during the following 10 minutes. Data were analyzed using the kinetic module of FlowJo software (v.9.7.6, Treestar) and modeled (1-phase exponential decay) using Prism software (GraphPad) to determine the half-life ( $t_{1/2} = \ln(2)/k_{off}$ ). The list of  $t_{1/2}$  for different TCRs tested with each epitope can be found in Table S4A, and the average of the logarithms of  $t_{1/2}$  for each epitope was used in Figure 3. The binding affinity ratio was not considered since it is not defined for tumor associated and viral antigens.

Cytolytic activity (Figure S3C) was measured by chromium release assay. <sup>51</sup>Cr-labeled HLA-A\*0201-positive TAP-deficient T2 cells, or alternatively CD4 blasts cells, were pulsed with serial dilutions of peptides of interest, and incubated with antigen-specific CD8+ T cell clones at an effector/target ratio of 4:1 for 4 hours at 37°C. Percentages of specific lysis were calculated as 100 x (experimental – spontaneous release) / (total – spontaneous release). EC<sub>50</sub> values were derived by dose-response curve analysis (log(agonist) versus response) using Prism software (GraphPad). The list of EC<sub>50</sub> values for different TCRs tested with each epitope can be found in Table S4B, and the average of the logarithms of EC<sub>50</sub> for each epitope was used in Figure S3C.

### Analysis of naturally presented HLA-I ligands

A subset of naturally presented HLA-I ligands detected by MS from the compilation done in Gfeller et al.<sup>12</sup> was selected to contain the same distribution of allele/length distribution as the neo-epitopes. These peptides were used to compute amino acid frequencies at MIA positions (Figure S4C). These frequencies were normalized by the amino acid frequencies between the fifth and the

second-to-last positions of the set of source proteins detected in HLA-I peptidomics studies. This is done to prevent confounding factors mainly because the first (including the starting methionine) and last residues are never found at MIA positions, by construction.

HLA-I ligands from the ten HLA peptidomics samples measured in Gfeller et al.<sup>12</sup> and not included in the training of MixMHCpred were used to benchmark predictions of HLA-I ligands with PRIME and MixMHCpred. AUC values (Figure S4D) were computed by taking as negatives for each sample 99-fold excess peptides randomly selected from the human proteome with length 8 to 14.

### Analysis of antigen-specific CD8+ T cells from healthy donors and cancer patients

Peripheral blood mononuclear cells (PBMCs) were collected from HLA-A\*02:01 positive healthy donors (HDs). Fresh PBMCs were positively enriched using anti-CD8-coated magnetic beads (Miltenyi Biotec), stained in PBS, 0.2% BSA, 5 mM EDTA with anti-CCR7 and anti-CD45RA for 45 min at 4°C. After washing, cells were resuspended in PBS, 0.2% BSA, 5 mM EDTA containing DAPI and naive CD8+ T cells (CCR7<sup>+</sup>/CD45RA<sup>+</sup>) were directly sorted on a FACSAria flow cytometer (BD Biosciences). Purified naive CD8+ T cells were plated in 24-well plates (2x10<sup>6</sup>/ml) and stimulated three times *in vitro* (every 10 days) with 1 μM of single CMV or HIV-derived peptides, irradiated autologous PBMC and 150 U/ml of rIL-2. Ten days after the last stimulation the T cell cultures were tested for IFN-γ production by ELISpot following manufacturer's instructions. Briefly, 100,000 CD8+ T cells were incubated for 16 h with 30,000 T2 cells priorly pulsed for 1 h with single CMV or HIV variant peptides (1 μM). A positive response was considered if the average number of spots in the peptide-exposed wells was ≥ 2-fold higher than the number of spots in the unstimulated wells, and there were ≥ 10 specific spots/100,000 T cells. For positive responses, the number of IFN<sub>γ</sub>-secreting cells reported in Table S4C correspond to the number of spots in the stimulated well minus the number of spots in the background (unstimulated well). The ELISpot assay was performed according to manufacturer's instructions (Mabtech, Nacka Strand, Sweden). All measurements were performed in duplicates. As these experiments are based on pathogen derived peptides directly used to stimulate CD8 T cells, NetChop, TAP, Ratio and DisToSelf were not included in Figure 4C, as they are either not defined or less meaningful.

### Peptides and pMHC NTAmers

Peptides and pMHC NTAmers were produced by the Peptide and Tetramer Core Facility (PTCF) of the University of Lausanne. Peptides were HPLC purified (≥90% pure), verified by MS and kept lyophilized at -80°C. NTAmers containing 5% glycerol, were aliquoted (5 ul), kept at -80°C and single used.

### Mouse immunization

HLA-A\*02:01/DR1 transgenic, H-2<sup>-/-</sup> mice<sup>66</sup> (n = 4-7 per condition) were immunized with peptides essentially as described<sup>68</sup>. In brief, single CMV-derived peptides and the DR1 restricted influenza HA<sub>306-318</sub> peptide (10 μg each) were injected subcutaneously at the base of the tail in an emulsion containing PBS, IFA and ODN 1826 (InvivoGen, San Diego). Only one peptide (i.e., P5 variants of the CMV epitope NLVPMVATV) was injected in each mice. After two weeks mice were booster immunized and a fortnight later their spleens harvested, 100,000 splenocytes were incubated overnight with T2 cells previously pulsed with different concentrations (ranging from 10<sup>-3</sup>-10<sup>3</sup> nM) of single peptide at a 1:1 ratio. Production of IFN<sub>γ</sub> was assessed using a mouse ELISpot kit following the manufacturer's instructions (Mabtech, Nacka Strand, Sweden). A positive response was considered positive if the number of spots in the peptide-exposed wells was ≥ 2-fold higher than the number of spots in the un-stimulated wells, and there were ≥ 10 specific spots/100,000 splenocytes. All measurements were performed in duplicates. The functional avidity of the different peptide-specific T cell responses was determined by calculating the peptide concentration able to mobilize 50% of the maximal number of spot forming unit (SFU).

### Recombinant protein production and X-ray crystallography

Recombinant SILv44 TCR and HLA-A\*02:01 were generated from bacterially-produced inclusion bodies as previously described<sup>69</sup>. Peptides were synthesized commercially and obtained at > 95% purity. Proteins were refolded *in vitro* and purified using ion-exchange followed by size exclusion chromatography, concentrated, and concentrations determined using predicted extinction coefficients. Crystals of SILv44 bound to PMEL<sub>209(2M)-217</sub> were grown in 20% PEG 3350 and 236 mM ammonium citrate dibasic at 6 mg/mL total protein concentration by vapor diffusion at 23°C. Diffraction data was collected on the 22ID beamline at the Advanced Photon Source at Argonne National Laboratories. Data was indexed, integrated, and scaled in HKL2000<sup>70</sup>. The structure was solved by molecular replacement using the MoRDa pipeline within the CCP4 suite<sup>71</sup>. Following molecular replacement, the model was rebuilt using PHENIX Autobuild<sup>72</sup>. Multiple rounds of restrained refinement were performed using PHENIX Refine<sup>73</sup>. Evaluation of models and map fitting were performed using COOT<sup>74</sup>. Structures were evaluated by MolProbity<sup>75</sup> during and after refinement. The fully refined complex was deposited to the Protein Data Bank and assigned accession code PDB: 6VM8 (see Table S5A). The assembled pHLA-TCR biological unit can be constructed by visualization of symmetry-related molecules.

### Analysis of TCR binding and peptide/HLA-A\*02:01 thermal stability

Surface plasmon resonance (SPR) experiments were conducted on a Biacore T200 instrument in 10 mM HEPES (pH 7.4), 150 mM NaCl, 3 mM EDTA and 0.005% surfactant P-20 at 25°C as previously described<sup>69</sup>. TCRs were coupled to a Biacore CM5 sensor chip using amine coupling. Increasing concentrations of pHLA were flowed over immobilized SILv44 at a rate of 5 μL/min. Steady-state

responses (RU) were determined by averaging the final 10 s of each injection and subtracting the response values from identical injections over a blank surface. Each concentration was injected in duplicate for each experiment. Binding affinity was determined by fitting a 1:1 binding curve to a plot of RU versus pHLA concentration. Both datasets were globally fit to enhance accuracy and precision of the determined  $K_D$ <sup>76</sup>. The reported SILv44  $K_D$  value is the average and standard deviation of three independent measurements. Thermal stability experiments were measured by differential scanning fluorimetry (DSF) using SYPRO fluorescent dye as previously described<sup>77</sup>. RT-PCR excitation and emission wavelengths were set to 587 nm and 607 nm, respectively. Excess SYPRO orange was added to approximately 10  $\mu$ M of protein. The temperature range spanned 20–95°C at a ramp rate of 1°C/min. Melting temperature values were determined by fitting the peak center of the first derivative of the melting curve fit to a Bigaussian function, with errors reported as standard fitting errors.

### Analysis of known X-ray structures

TCR-pHLA X-ray structures were downloaded from the PDB. Structures with mutated HLA-I alleles, modified/non-peptidic epitopes or incomplete TCRs were not included. The final list of structures with 9-mer epitopes is available in Table S5B. For each structure, the contacts between the sidechains of the epitope and the TCR were computed, using a threshold of 4Å between heavy atoms. Epitope sidechains making direct contacts with the TCR are listed in Table S5B. Amino acid frequencies at these positions were computed and normalized by the average amino acid frequencies in the source proteins of the epitopes (for synthetic peptides, the amino acid frequency in the human proteome was used) (Figure 5E). As many structures contain redundant epitopes, each epitope, and the corresponding source protein, was weighted by the inverse of the number of epitopes that show at least 80% sequence identity, resulting in an effective number of sequences (i.e., sum of weights) equal to 22.44. Representative structures of each 9-mer epitope with aromatic sidechains interacting with the TCR are displayed in Figure S5C.

### Analysis of TCGA data

TCGA mutations from BLCA, BRCA, CESC, COAD, GBM, HNSC, LGG, LIHC, LUAD, LUSC, OV, PAAD, PRAD, SKCM, STAD, THCA and UCEC tumor types were downloaded from the GDC data portal using the Aggregated Somatic Mutations files. Non-synonymous single nucleotide substitutions identified by MuSE, MuTect2, SomaticSniper and VarScan2 were considered. Mutations were mapped to the GRCh38 or GRCh37 proteome to retrieve all 9- to 11-mers encompassing each mutation. HLA-I typing was retrieved from The Cancer Immune Atlas (TCIA)<sup>78</sup>, and completed by data from Marty et al.<sup>32</sup> for samples without HLA-I typing data in TCIA (8,317 tumor samples in total with available HLA-I typing, representing a total of 1,136,329 unique mutations, with 92.8% percent observed only once, 5.8% observed in two patients and 0.075% observed in more than five patients).

Expression values were used for all patients where they were available (7,736 patients) and a threshold of 1 FPKM was used to define genes that were poorly expressed. Clonality predictions were performed by comparing the mutant allelic fraction (average over all four variant callers) with the one expected after tumor purity correction. Tumor purity values were retrieved from Aran et al.<sup>79</sup> or estimated with EPIC<sup>80</sup> for samples absent from this study and with available expression data (8,185 samples in total). In first approximation, the expected mutant allelic fraction was defined as the coverage (based on the average of all four variant callers) multiplied by the purity and divided by 2. To account for variability in cancer genomic data and provide conservative predictions of sub-clonality, sub-clonal mutations were defined as those having a reported mutant allelic fraction lower than 50% of the expected one. Patients predicted to have altered antigen presentation machinery were defined as those harboring deleterious mutations (based on SIFT “deleterious” or “deleterious\_low\_confidence” predictions and PolyPhen “probably\_damaging” or “possibly\_damaging” predictions) in the HLA-A, HLA-B, HLA-C, B2M, TAP1, TAP2, TAPBP, TAPBPL, ERAP1 or ERAP2 genes. These filters removed 59.6% of actual mutation/patient pairs considered in Figure 6C.

### Statistical model of immunoeediting

To compute the frequency of a mutation among patients where it would give rise to neo-epitopes, and those where it would not, the PRIME %rank was computed for all 9- to 11-mers encompassing the mutation with each HLA-I allele of each patient. Patients with at least one peptide encompassing the mutated residue showing a PRIME %rank score lower or equal to 0.5% with at least one of the patient’s HLA-I alleles were assigned to the group where the mutation would be immunogenic ( $P^+$  in Figure 6A). Patients with all peptides showing a PRIME %rank larger or equal to 2% with all HLA-I alleles of the patient were assigned to the group where the mutation would not be immunogenic ( $P^-$ ). The frequency of the mutation was then computed within each group ( $f^+ = (|P^+ \cap M| / |P^+|)$  and  $f^- = (|P^- \cap M| / |P^-|)$ ), where  $M$  indicates the set of patients that actually have the mutation and  $N = |M|$ . Cases where  $P^+$  was equal to zero (< 2% of all mutations, including only PIK3CA\_E542K among mutations observed more than 15 times) were not considered since the frequency  $f^+$  could not be mathematically defined, although these may represent another type of interesting immunoeediting (i.e., mutations not predicted to be immunogenic in any patient). The mean value of the difference between  $f^+$  and  $f^-$  across mutations observed exactly  $N$  times or at least  $N^{min}$  times are shown in Figures 6C and 6D. For mutations observed less than five times, a random subset of one thousand mutations was used.

To preserve existing linkage between HLA-I alleles in the analysis with randomized HLAs, all alleles of one patient were randomly swapped with those of another patient, further requesting that no patient gets the same HLA-I alleles as the original ones after randomizing. 20 different random seeds were used in this randomization of HLA-I alleles (mean and standard deviation shown with red circles and error bars in Figures 6C and 6D).



## QUANTIFICATION AND STATISTICAL ANALYSIS

### Enrichment analysis for neo-epitopes

Two-sided Wilcoxon tests were used to measure the enrichment of high scoring peptides among neo-epitopes in [Figure 1C](#) for each predictor.

### Half-lives and $EC_{50}$

For each epitope, average half-life was computed by taking the average of the logarithm of the half-lives measured for different clones ([Table S4A](#)). Similarly, the log of  $EC_{50}$  values for different clones ([Table S4B](#)) were averaged in [Figure S3C](#). Pearson correlation coefficients used in [Figures 3](#) and [S3C](#) and corresponding P values were computed with the `cor.test` function in R.

### Correlation with ELISpot signals

Correlation between ELISpot signals ([Figure 4C](#)) or ranking ([Figure S4I](#)) and different predictors were measured with Spearman correlation and corresponding P values were computed with the `cor.test` function in R.

### Analysis of TCGA data

Mutations were grouped based on their number of occurrences ( $N$ ) in TCGA patients considered in this work. Pearson correlation between  $\log(N)$  and  $\langle f^+ - f^- \rangle$  were computed in [Figures 6C](#) and [6D](#) and statistical significance was assessed based on the `cor.test` function in R. Two-sided Wilcoxon test were used in the insets of [Figures 6C](#) and [6D](#).

## ADDITIONAL RESOURCES

The new immunogenicity predictor is available through the online interface <http://prime.gfellerlab.org/> and code (including command-line executables) can be downloaded from: <https://github.com/GfellerLab/PRIME>.



**Cell Reports Medicine, Volume 2**

**Supplemental Information**

**Prediction of neo-epitope immunogenicity  
reveals TCR recognition determinants  
and provides insight into immunoediting**

**Julien Schmidt, Angela R. Smith, Morgane Magnin, Julien Racle, Jason R. Devlin, Sara Bobisse, Julien Cesbron, Victor Bonnet, Santiago J. Carmona, Florian Huber, Giovanni Ciriello, Daniel E. Speiser, Michal Bassani-Sternberg, George Coukos, Brian M. Baker, Alexandre Harari, and David Gfeller**

# Supplemental Information

## Supplementary Figures

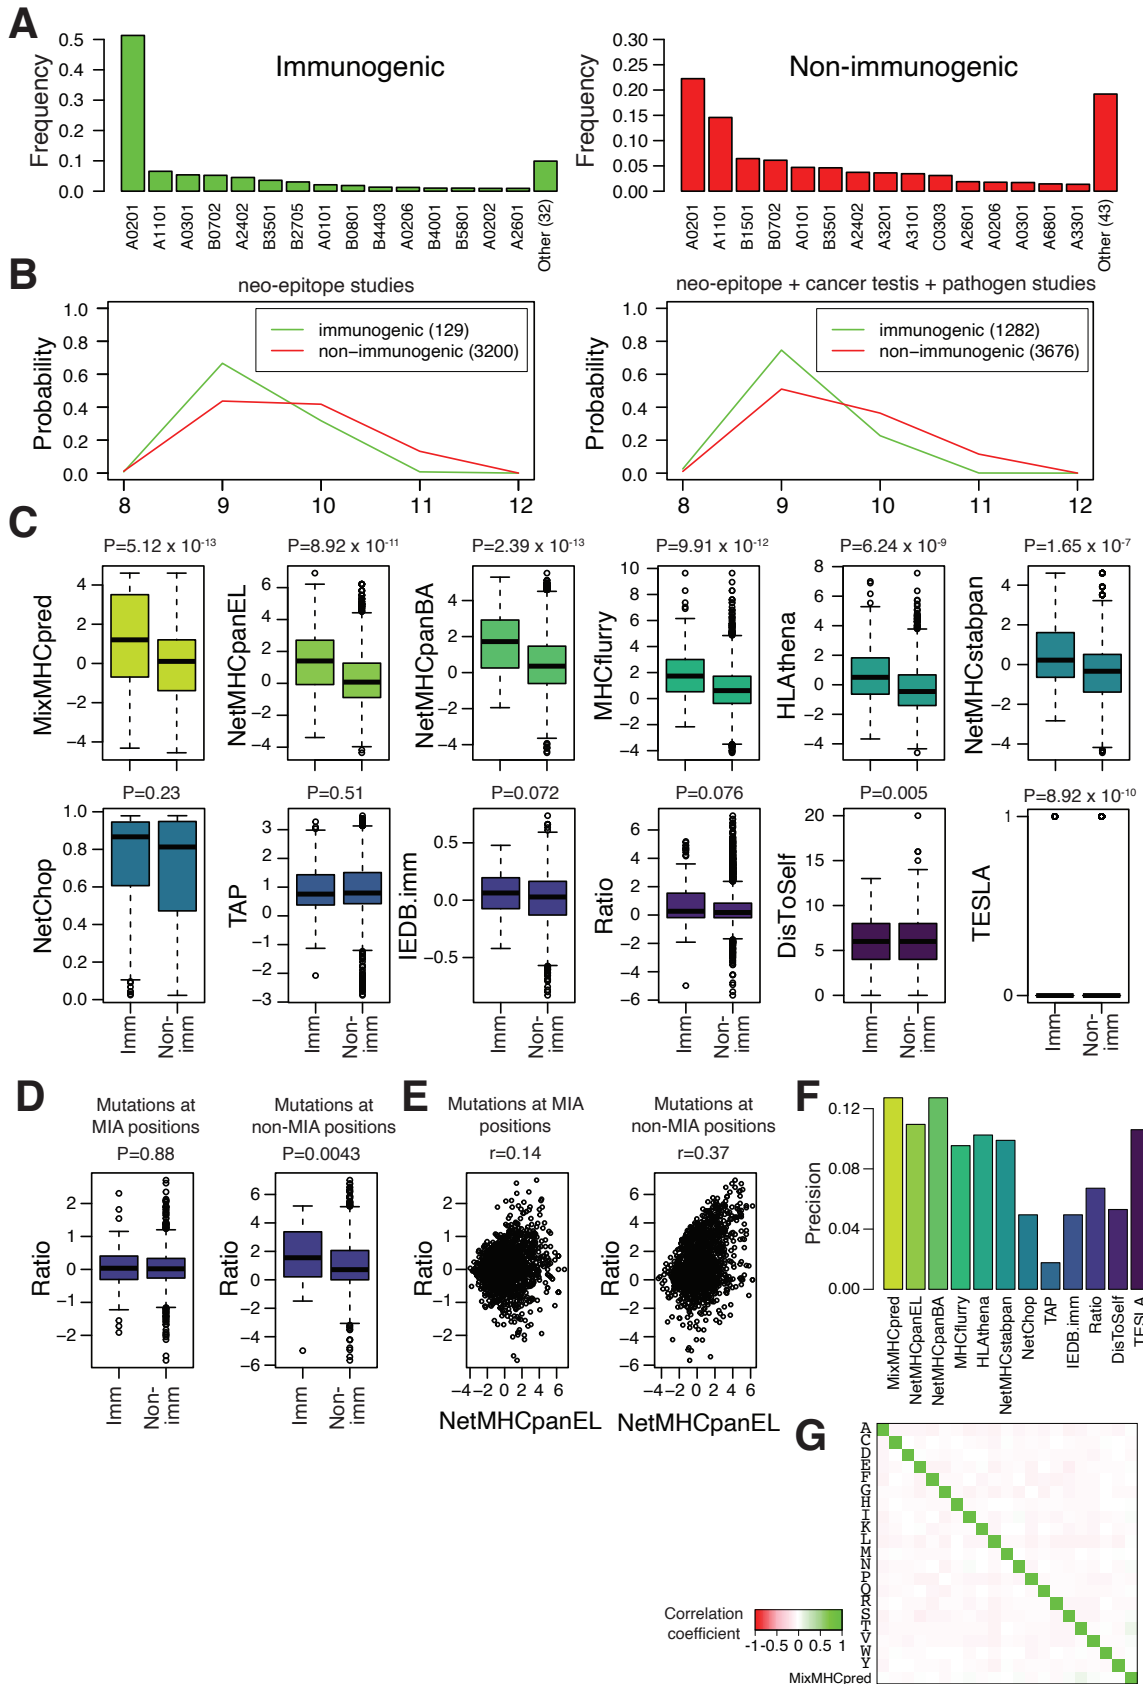

**Figure S1: Immunogenicity predictions beyond presentation on HLA-I molecules, related to Figure 1.**

(A) Allele coverage across immunogenic (green) and non-immunogenic (red) peptides from mutated proteins in cancer, cancer testis antigens and pathogen proteins.

(B) Peptide length distribution of immunogenic and non-immunogenic peptides analyzed in cancer neo-epitope studies (left) and cancer neo-epitope + cancer testis antigen + pathogen epitope studies (right).

(C) Distribution of the scores of existing predictors for immunogenic (“Imm”,  $n=129$ ) and non-immunogenic (“non-Imm”,  $n=3'200$ ) cancer mutated peptides used in our benchmark. P-values are computed based on Wilcoxon test and are also shown in Figure 1C.

(D) Ratio of binding affinity between the mutated and the wt for immunogenic and non-immunogenic cancer mutated peptides for mutations falling at positions with minimal impact on binding affinity (MIA positions, STAR Method) (left) or other positions (right).

(E) Correlation between the predicted affinity and the Ratio of affinity between mutant and wt for immunogenic and non-immunogenic mutated peptides with mutations falling at MIA positions (left) or other positions (right).

(F) Precision among the top  $n$  predicted mutated peptides for each predictor, where  $n=283$  corresponds to the number of mutated peptides predicted to be immunogenic by the TESLA method.

(G) Spearman correlation between the different input features of PRIME across all peptides used in our training set.



immunogenic peptides. Each of the seven studies was iteratively used as test set. The other six studies were used for training, together with 6/7th of the other data (i.e., other neo-epitope studies + Pathogen/cancer testis + random). Right: Leave-one-allele-out cross-validation across the nine HLA-I alleles with at least five immunogenic and five non-immunogenic peptides in neo-epitope studies. Peptides restricted by HLA-I alleles of the same supertype as the one used in the test set (A02 in this example) were excluded from the training.

(B) Benchmarking variants of PRIME trained without predicted affinity (“PRIME\_NoMix”, dark green), trained without predicted affinity and without threshold on affinity values (“PRIME\_NoMix\_NoThresh”, green) and trained after randomizing MIA positions (“PRIME\_Random\_MIA”, dark red). For comparison, results for PRIME (yellow), MixMHCpred (light green), IEDB.imm with thresholding (dark blue) and IEDB.imm without thresholding (blue) are shown.

(C) Effect of combining NetChop, TAP, IEDB.imm and DisToSelf with MixMHCpred.

(D) Effect of combining NetChop, TAP, IEDB.imm and DisToSelf with PRIME. “comb” (cyan bars) stands for the full combination (NetChop + TAP + IEDB.imm + DisToSelf w/o PRIME).

(E) Effect of the threshold on predicted binding to HLA-I ( $T=5\%$ rank, based on MixMHCpred).

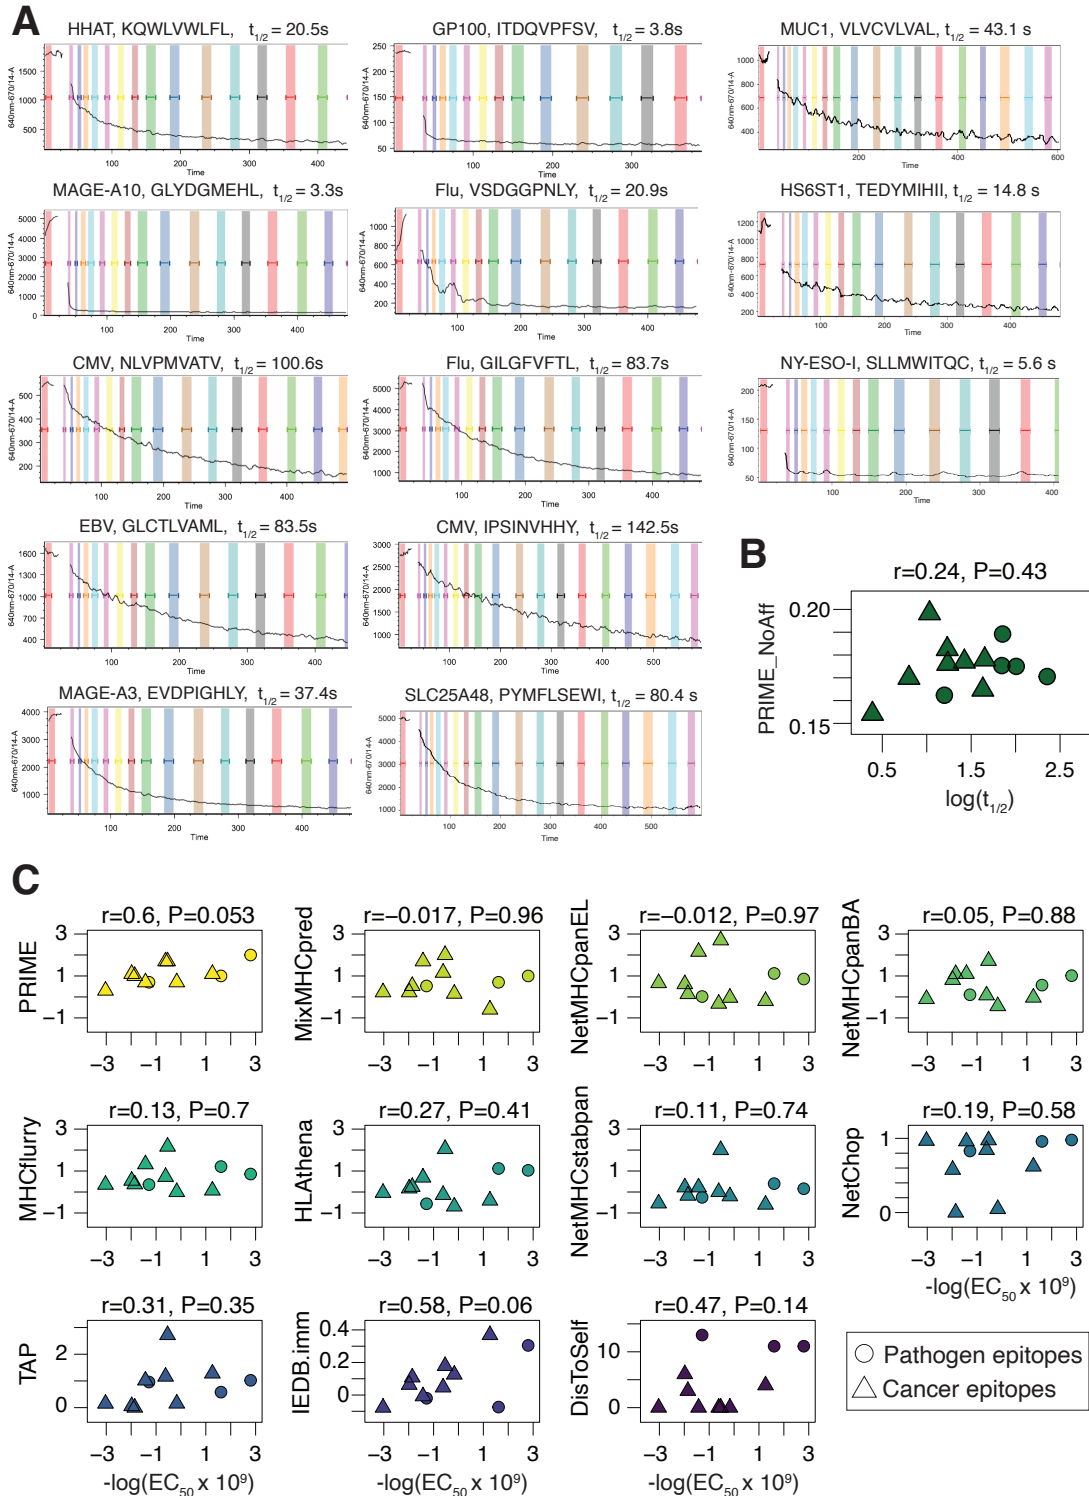

**Figure S3: PRIME correlates with structural avidity, related to Figure 3.**

(A) Representative results of dissociation assays (one for each epitope in Figure 3) for the off-rate measurements. The fluorescence intensity in the colored regions was averaged and used to fit a single-phase exponential decay.

(B) Correlation between structural avidity ( $t_{1/2}$ ) and the predictions of PRIME trained without affinity predictions (PRIME\_NoAff).

(C) Correlation between killing (i.e.,  $-\log(EC_{50})$ , averaged over multiple clones, see Table S4B) measured for eleven epitopes and the scores of the different predictors. Pearson correlation coefficients and P-values are shown above each plot.



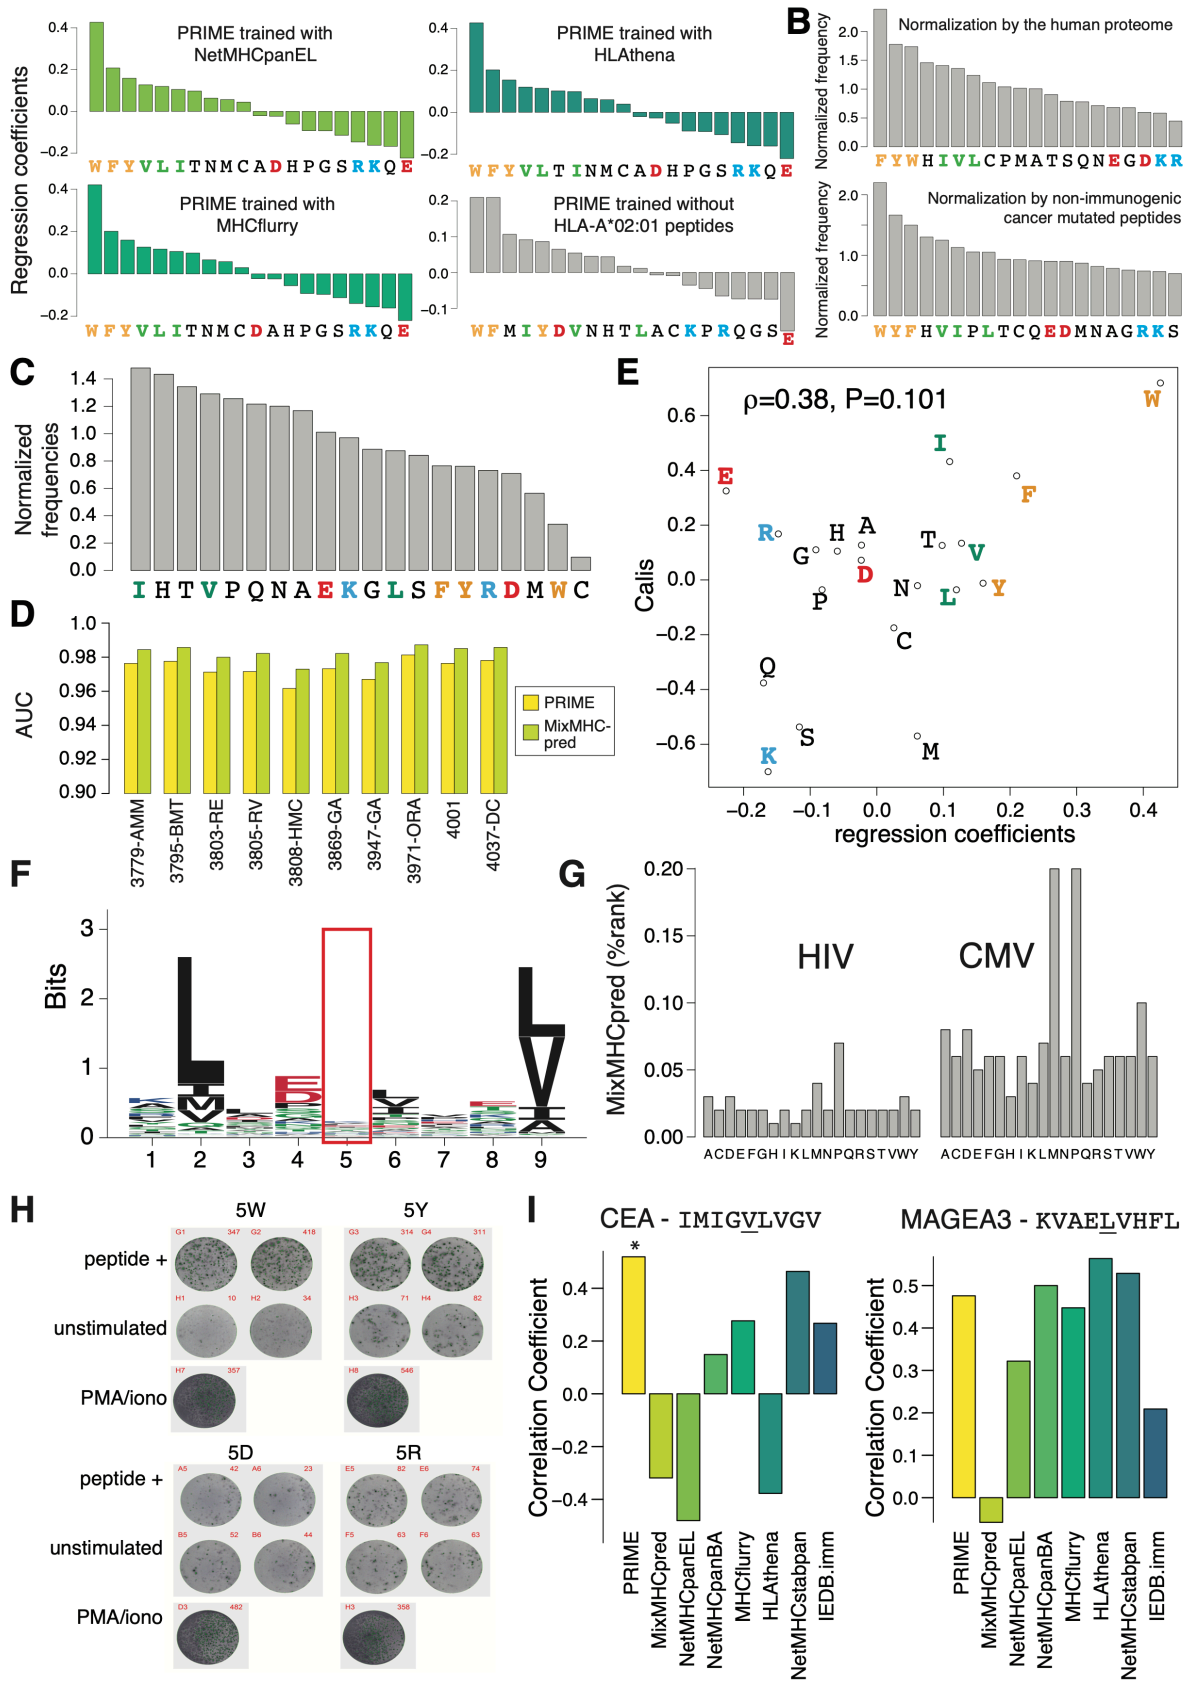

**Figure S4: PRIME reveals determinants of TCR recognition, related to Figure 4.**

(A) Coefficients of the logistic regression of PRIME using affinity to HLA-I (%rank) predicted by NetMHCpanEL, MHCflurry or HLAthena, or excluding peptides restricted to HLA-A\*02:01.

(B) Normalized amino acid frequencies at MIA positions in neo-epitopes. Normalization is done either by amino acid frequencies in the human proteome (taking for each protein residues between the fifth and the second-to-last positions to mimic the definition of MIA positions) (upper panel), or by amino acid frequencies at MIA positions in non-immunogenic cancer mutated peptides with the same distribution of predicted affinity to HLA-I, same HLA-I allele distribution and same peptide length distribution as the neo-epitopes (lower panel).

(C) Normalized amino acid frequencies at MIA positions for a set of HLA-I ligands identified by MS with the same allele/length distribution as neo-epitopes. Normalization is done by the amino acid frequencies in proteins seen in HLA-I peptidomics studies (taking for each protein residues between the fifth and the second-to-last positions).

(D) AUC obtained for the predictions with PRIME and MixMHCpred of naturally presented HLA-I ligands identified in the ten samples measured in Gfeller et al. (2018) (i.e., not included of the training of MixMHCpred).

(E) Comparison between the regression coefficients of PRIME (Figure 4A) and the coefficients of amino acids reported in Calis et al. (2013) The Spearman correlation coefficient and the corresponding P-value are indicated.

(F) Motif of HLA-A\*02:01. The red box shows the fifth position, which displays very low specificity.

(G) Predicted binding of all the P5 variants of the HIV (ALIRILQQL) and CMV (NLVPMVATV) epitopes with MixMHCpred.

(H) Representative results of the IFN $\gamma$  ELISpot assays of Figure 4B for four different P5 variants of the CMV epitope (NLVPMVATV) with donor d2. The second line corresponds to unstimulated wells and the third line to the positive control (PMA/iono).

(I) Spearman correlation coefficient between IFN $\gamma$  ELISpot signals from Tangri et al. (2001) for CEA (IMIGVLVGV) P5 analogs (n=17) or MAGEA3 (KVAELVHFL) P5 analogs (n=11) and the scores of different HLA-I ligand and immunogenicity predictors. Stars indicate P-values smaller than 0.05.

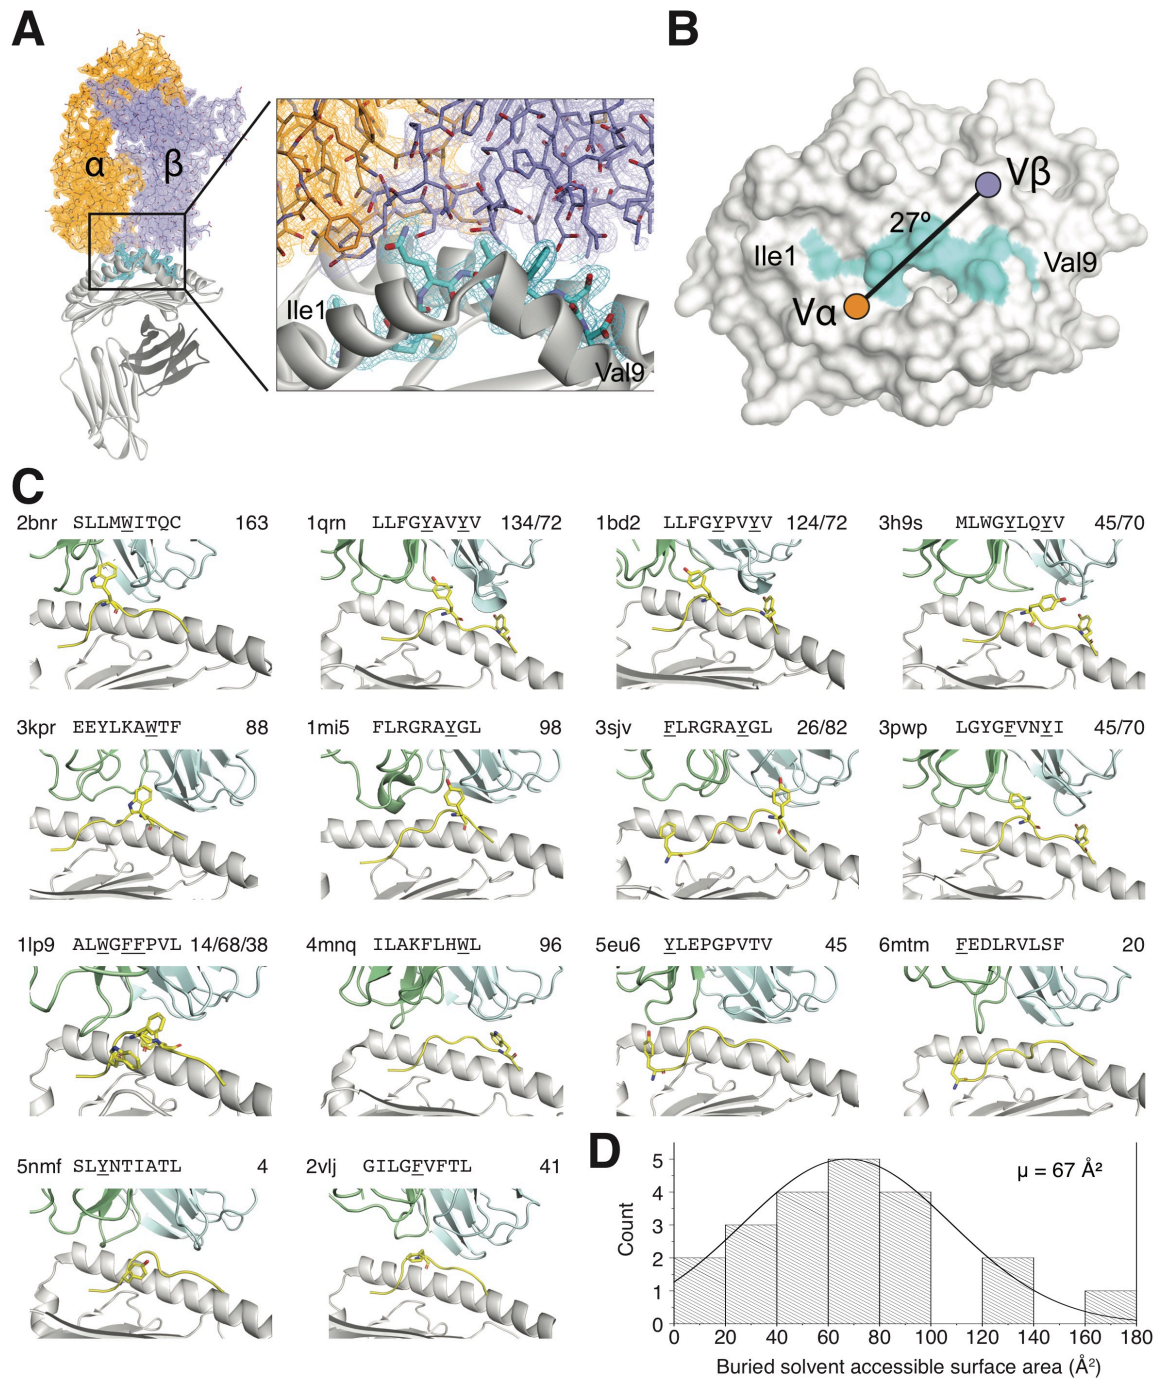

**Figure S5: Structural interpretation of PRIME predictions, related to Figure 5.**

(A) Structure of the complex with  $2F_o - F_c$  electron density contoured at  $1\sigma$  shown for the TCR and the peptide.

(B) Positioning of the TCR over the pHLA. The TCR binds with a traditional crossing angle of  $27^\circ$ .

(C) Visualization of representative structures for 9-mer epitopes with aromatic residues directly contacting the TCR in X-ray structures from the PDB. The peptide is in yellow, the HLA-I in grey, the TCR $\alpha$  chain in light green and the TCR $\beta$  chain in light blue. The PDB code, peptide sequence and buried solvent accessible surface area ( $\text{\AA}^2$ ) of each underlined residue (same order as in the sequence) are given on top of each structure.

Underlined peptide residues shown with sticks in the structures correspond to aromatic sidechains making direct contact ( $<4\text{\AA}$ ) with the TCR.

(D) Distribution of buried solvent accessible surface areas across residues highlighted in (C).

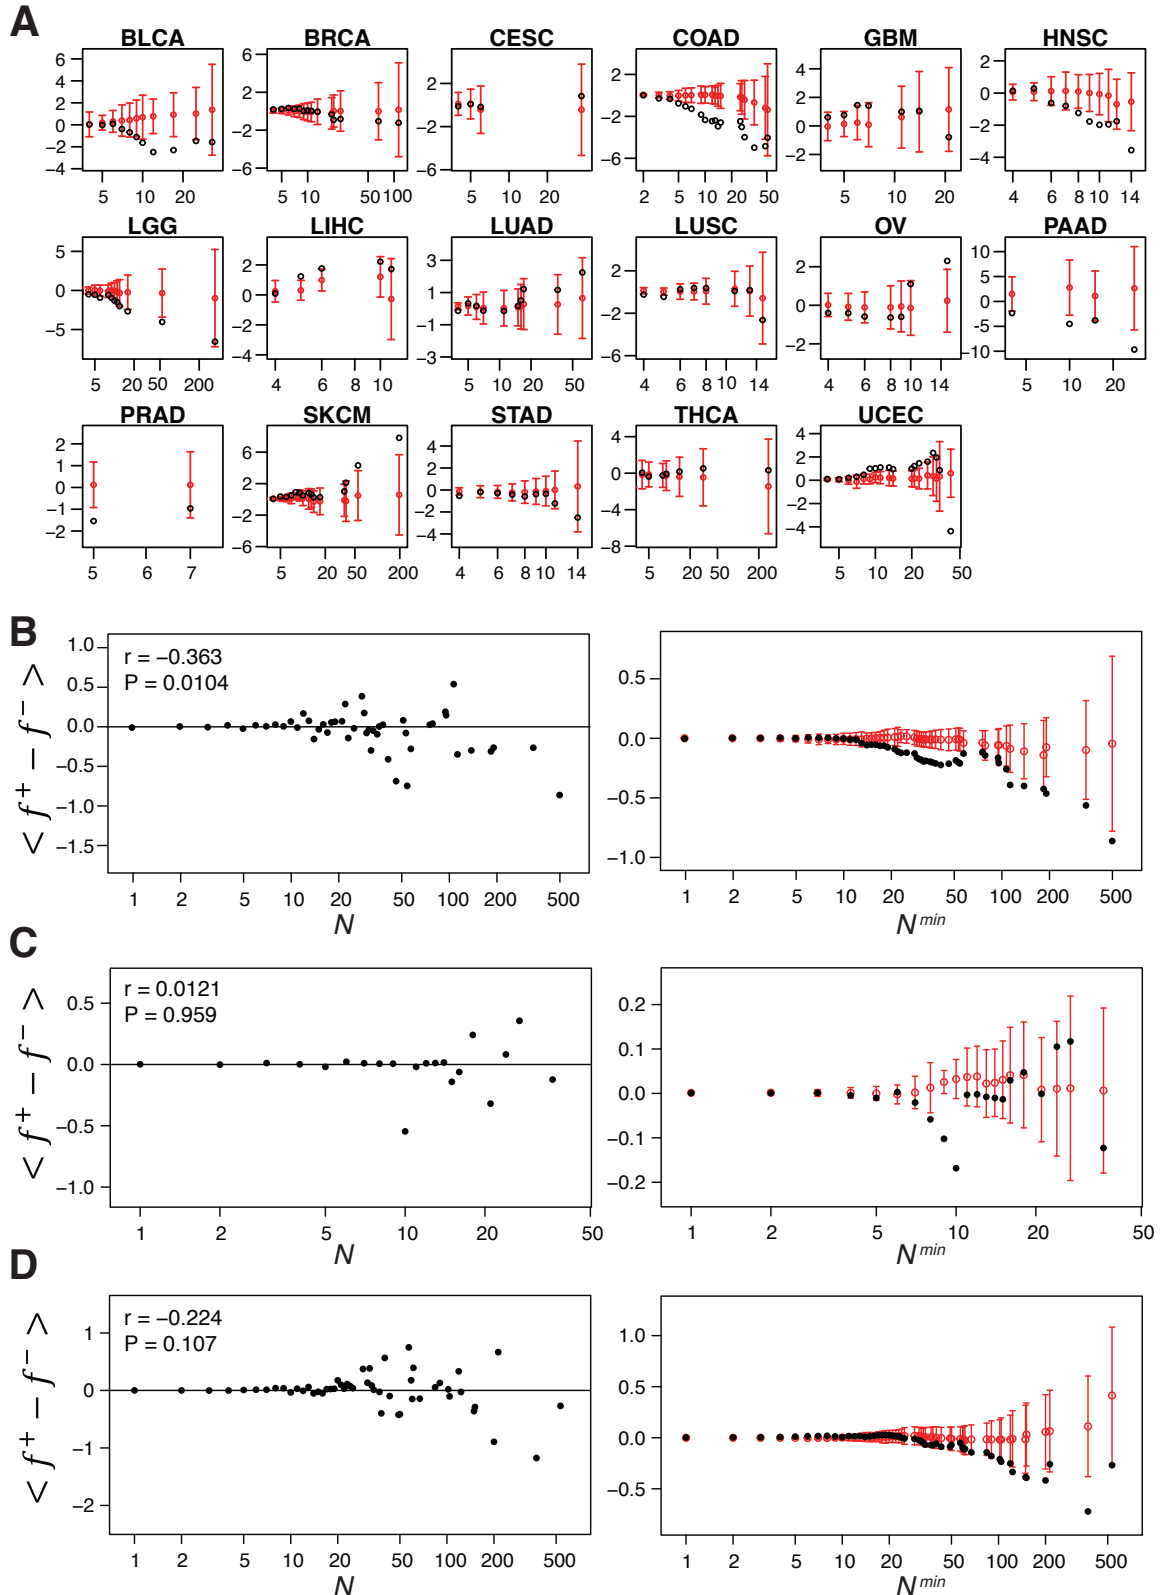

**Figure S6: PRIME is consistent with immunoediting in human cancer, related to Figure 6.**

(A) Average value of  $f^+ - f^-$  for mutations observed at least  $N^{min}$  times in each tumor type in the TCGA cohort. Red points and error bars indicate the results after randomly shuffling the HLA-I alleles among patients of each tumor type.

(B) Analysis of TCGA mutation frequencies in patients where they are predicted to be immunogenic ( $f^+$ ) and patients where they are not ( $f^-$ ), excluding from  $M$  (see Figure 6A) patients where a given mutation is found in

a poorly expressed gene, is predicted to be sub-clonal, or come from patients with deleterious alterations in antigen presentation genes.

(C) Analysis of TCGA mutation frequencies in patients where they are predicted to be immunogenic ( $f^+$ ) and patients where they are not ( $f^-$ ), restricting  $M$  (see Figure 6A) to patients where the mutation either come from a poorly expressed, is predicted to be sub-clonal, or patients with deleterious alterations in antigen presentation genes.

(D) Analysis of TCGA mutation frequencies in patients where they are predicted to be immunogenic ( $f^+$ ) and patients where they are not ( $f^-$ ), with predictions based on binding to HLA-I (MixMHCpred).

## Supplementary Tables

**Table S2: Positions with minimal impact on HLA-I affinity, related to Figure 1.**

Positions with minimal impact on HLA-I affinity and potentially interacting with the TCR for each of the alleles used for training PRIME. Different values of 'g' correspond to different groups of HLA-I alleles with distinct MIA positions (see STAR Method).

| HLA-I      | Motif | g | HLA-I      | Motif | g | HLA-I      | Motif | g |
|------------|-------|---|------------|-------|---|------------|-------|---|
| HLA-A01:01 |       | 1 | HLA-A68:12 |       | 1 | HLA-B44:03 |       | 1 |
| HLA-A01:03 |       | 1 | HLA-A69:01 |       | 1 | HLA-B45:01 |       | 1 |
| HLA-A02:01 |       | 2 | HLA-B07:02 |       | 1 | HLA-B49:01 |       | 1 |
| HLA-A02:02 |       | 1 | HLA-B08:01 |       | 6 | HLA-B51:01 |       | 1 |
| HLA-A02:03 |       | 3 | HLA-B14:02 |       | 6 | HLA-B53:01 |       | 1 |
| HLA-A02:06 |       | 2 | HLA-B15:01 |       | 1 | HLA-B56:01 |       | 1 |
| HLA-A02:11 |       | 2 | HLA-B15:02 |       | 1 | HLA-B57:01 |       | 1 |
| HLA-A03:01 |       | 1 | HLA-B15:17 |       | 1 | HLA-B58:01 |       | 1 |
| HLA-A11:01 |       | 1 | HLA-B18:01 |       | 1 | HLA-C01:02 |       | 1 |
| HLA-A23:01 |       | 1 | HLA-B27:02 |       | 1 | HLA-C02:02 |       | 1 |
| HLA-A24:02 |       | 1 | HLA-B27:05 |       | 1 | HLA-C03:03 |       | 1 |
| HLA-A25:01 |       | 4 | HLA-B35:01 |       | 1 | HLA-C03:04 |       | 1 |
| HLA-A26:01 |       | 4 | HLA-B35:03 |       | 1 | HLA-C04:01 |       | 1 |
| HLA-A29:02 |       | 5 | HLA-B37:01 |       | 6 | HLA-C05:01 |       | 1 |
| HLA-A30:01 |       | 1 | HLA-B38:01 |       | 1 | HLA-C06:02 |       | 1 |
| HLA-A30:02 |       | 1 | HLA-B39:01 |       | 1 | HLA-C07:01 |       | 1 |
| HLA-A31:01 |       | 1 | HLA-B39:06 |       | 1 | HLA-C07:02 |       | 1 |
| HLA-A32:01 |       | 1 | HLA-B40:01 |       | 1 | HLA-C08:02 |       | 1 |
| HLA-A33:01 |       | 1 | HLA-B40:02 |       | 1 | HLA-C12:03 |       | 1 |
| HLA-A66:01 |       | 1 | HLA-B41:01 |       | 1 | HLA-C14:02 |       | 1 |
| HLA-A68:01 |       | 1 | HLA-B41:02 |       | 1 | HLA-C15:02 |       | 5 |
| HLA-A68:02 |       | 6 | HLA-B44:02 |       | 1 | HLA-C16:01 |       | 1 |
